1     **NK cells force cytomegalovirus to use hematopoietic cells and immune**  
2                     **evasion for dissemination after mucosal infection**

3                     Shunchuan Zhang<sup>1</sup>, Finn Grey<sup>2\*</sup> and Christopher M. Snyder<sup>1\*</sup>

4

5     <sup>1</sup>Department of Microbiology and Immunology, Sidney Kimmel Medical College, Sidney  
6     Kimmel Cancer Center, Thomas Jefferson University, Philadelphia, PA, 19107

7     <sup>2</sup>Division of Infection and Immunity, The Roslin Institute, University of Edinburgh,  
8     Easter Bush, Midlothian, United Kingdom

9     \*corresponding authors

10

11     Address correspondence to:

12

13     Christopher M Snyder

14     Email: [Christopher.snyder@jefferson.edu](mailto:Christopher.snyder@jefferson.edu)

15

16     Finn Grey

17     Email: [finn.grey@roslin.ed.ac.uk](mailto:finn.grey@roslin.ed.ac.uk)

18

19     ORCIDiDs:

20     SZ: 0000-0003-0143-9034

21     FG: 0000-0003-4288-2059

22     CMS: 0000-0003-1370-7198

23

24     **Short title:** NK cells and immune evasion govern CMV dissemination from mucosal  
25     tissues.

26

27 **Abstract**

28 Cytomegalovirus (CMV) infects most people in the world and causes clinically important  
29 disease in immune compromised and immune immature individuals. How the virus  
30 disseminates from the initial site of infection is poorly understood. We used an innovative  
31 approach, involving insertion of target sites for the haematopoietic specific miRNA miR-  
32 142-3p into an essential viral gene in murine cytomegalovirus. This virus was unable to  
33 disseminate to the salivary gland following intranasal infection, demonstrating a strict  
34 need for hematopoietic cells for dissemination from the natural site of infection. Viral  
35 immune evasion genes that modulate MHC-I expression and NKG2D activation were  
36 also required in this setting, as MCMV lacking these genes exhibited impaired  
37 dissemination of the viral genome to the salivary gland, and there was no detectable viral  
38 replication in the salivary gland. Depletion of T cells rescued the replication of this  
39 evasion-deficient virus in the salivary gland. Surprisingly however, the early  
40 dissemination to the salivary gland of this evasion-deficient virus, could be rescued by  
41 depletion of NK cells, but not T cells. These data are the first to show a profound loss of  
42 MCMV fitness in the absence of its MHC-I evasion genes and suggest that they protect  
43 the virus from NK cells during hematopoietic dissemination to the salivary gland, where  
44 they continued to need the three evasion genes to avoid T cell responses. Remarkably, we  
45 found that depletion of NK cells also freed the virus from the need to infect  
46 hematopoietic cells in order to reach the salivary gland. Thus, our data show that MCMV  
47 adapts to NK cell pressure after intranasal infection by using hematopoietic cells for  
48 dissemination while immune evasion genes protect the virus from NK cells during  
49 dissemination and from T cells within mucosal tissues.

50

## 51 **Introduction**

52 Cytomegalovirus (CMV), is the most common infectious cause of birth defects in the  
53 developed world, leading to hearing loss, vision impairment and cognitive/motor deficits  
54 and is estimated to affect 0.5% to 5% of children globally [1-3]. The greatest risk for the  
55 most devastating outcomes of congenital CMV infection occur when a pregnant mother  
56 experiences a primary infection and the virus disseminates from the site of entry (most  
57 likely the oral/nasal cavity) to the fetus [2, 3]. However, infection of the fetus in this  
58 circumstance is not universal. In fact, only ~40% of primary infections during pregnancy  
59 result in congenital infection, although the reasons for these drastically different  
60 outcomes are unknown. Thus, an understanding of the host/pathogen relationship that  
61 governs viral dissemination from the site of entry is critical for the development of  
62 effective anti-viral strategies and vaccines.

63

64 Primary CMV infection in immune-competent hosts is usually clinically silent, which  
65 makes early natural infection difficult to detect and study. Several excellent animal  
66 models have been described for investigating CMV infections, including murine  
67 (M)CMV, which has been extensively used for *in vivo* studies due to the wealth of  
68 available tools. Recent work has identified the nasal mucosa of mice as a natural site of  
69 primary MCMV infection [4]. After entry, MCMV must disseminate to the salivary gland,  
70 which is a key site of viral persistence and shedding for transmission to new hosts. Thus,  
71 understanding the host/pathogen interactions surrounding MCMV dissemination from the  
72 nasal mucosa to the salivary gland should provide key information about natural CMV

73 dissemination after primary infection. However, most studies with MCMV, as well as  
74 other animal models of CMV infection, have utilized non-physiological routes of  
75 infection including intraperitoneal (i.p.), intravenous (i.v.) or subcutaneous (s.c.)  
76 inoculation (e.g. [5-7]). After inoculation via the i.p., i.v., and even foot-pad (f.p.) routes,  
77 MCMV can directly infect cells in the spleen [5, 6, 8], indicating a direct hematogenous  
78 dissemination from the site of inoculation. In contrast, intranasal (i.n.) inoculation, like  
79 natural infection, involves no break of the barrier tissue, forcing the virus to go through at  
80 least one round of infection before it can disseminate.

81

82 Extensive work has suggested that infection of monocytes is important for MCMV  
83 dissemination to the salivary gland after foot-pad inoculation [9-12]. Moreover, very  
84 recent data has suggested that dendritic cells are important for viral dissemination to the  
85 salivary gland after i.n. infection [13], thus supporting a central role for hematopoietic  
86 cells in viral dissemination. If MCMV must infect hematopoietic cells for dissemination  
87 after i.n. inoculation, we reasoned that evasion of T cell and NK cell responses should  
88 facilitate viral spread. All CMVs encode several genes to block the MHC-I antigen  
89 presentation pathway. For MCMV there are 3 known genes (m04, m06 and m152),  
90 whose protein products act together to interfere with the trafficking of mature MHC-I to  
91 the cell surface, consequently protecting infected cells from killing by CD8<sup>+</sup> T cells [14-  
92 16]. Moreover, the m04 and m152 gene products also inhibit NK cell responses [17-20].  
93 However, despite clear *in vitro* evidence for the effectiveness of m04, m06 and m152 [14,  
94 16, 21-24], deletion of all three MHC-I evasion genes had only modest effects on viral  
95 dissemination and viral loads *in vivo* after i.p., i.v., or f.p infection [25-28]. In fact, these

96 genes were only found to be critical in three published cases. For MCMV, the Oxenius  
97 lab reported that loss of m04, m06 and m152 impaired viral replication in the salivary  
98 gland after i.v. infection when mice lacked CD4<sup>+</sup> T cells, and thus depended exclusively  
99 on CD8<sup>+</sup> T cells for viral control [29]. In addition, the Reddehase group reported that  
100 MHC-I evasion genes enhanced the latent MCMV load and played a vital role in viral  
101 reactivation from latency in lung explants [30]. Finally, using the Rhesus (Rh)CMV  
102 model, Picker, Früh and colleagues reported that evasion of MHC-I antigen presentation  
103 and CD8<sup>+</sup> T cell responses was critical for experimental superinfection (via the  
104 subcutaneous route) of Rhesus macaques that had been previously infected by RhCMV,  
105 and thus had robust pre-existing immunity [7].

106

107 We investigated the need for infection of hematopoietic cells after i.n. infection using  
108 novel recombinant strains of MCMV. Consistent with previous work we found that  
109 hematopoietic cells were critical for MCMV dissemination from the nasal mucosa in  
110 C57BL/6 mice. In this setting, MHC-I evasion genes enhanced the amount of virus that  
111 reached the salivary gland and protected MCMV from CD8<sup>+</sup> T cells within the nasal  
112 mucosa and salivary gland. Surprisingly, our data show that NK cells enforced this  
113 requirement: depletion of NK cells or use of BALB/c mice, allowed viral dissemination  
114 that did not require infection of hematopoietic cells or MHC-I evasion genes. These data  
115 show for the first time that MHC-I modulating genes can be critical for viral  
116 dissemination from a natural site of entry to a key site of shedding, providing an  
117 explanation for the presence of these genes in the CMV genome. Moreover, our data  
118 suggest that early immune responses and the genetic background of the mice directly

119 affect the efficiency of MCMV dissemination to the salivary gland after infection of the  
120 nasal mucosa.

121

## 122 **Results**

### 123 **MCMV must infect hematopoietic cells for dissemination in C57BL/6 mice after i.n.** 124 **inoculation**

125 MCMV has been proposed to disseminate from the nasal mucosa and other tissues in  
126 hematopoietic cells [13, 31]. To test whether infection of hematopoietic cells is necessary  
127 after intranasal infection, we constructed a recombinant MCMV containing four repeated  
128 targeting sites for the microRNA miR-142-3p in the 3' untranslated region of the  
129 essential viral gene IE3 (MCMV-IE3-142, Figure 1A). As miR-142-3p is exclusively  
130 expressed in hematopoietic cells, we predicted that MCMV-IE3-142 would fail to  
131 replicate in hematopoietic cells due to targeting of IE3 expression by miR-142, but would  
132 replicate to wild type levels in all other cell types. As a control, a second virus was  
133 produced containing shuttle vector sequences, but no miR-target sites (MCMV-IE3-015).  
134 While both viruses replicated equally well in 3T3 fibroblast cells, only the control virus  
135 replicated in macrophages (Figure 1B). To directly visualize the regulation of gene  
136 expression by miR-142-3p, a second set of viruses was produced containing GFP in the  
137 IE2 locus and either 4 miR-142-3p targeting sites (MCMV-GFP-142) or control vector  
138 sequences in the 3' untranslated region (MCMV-GFP-015) (Figure 1A). Both viruses  
139 expressed GFP in infected fibroblast cells, but only the control virus expressed GFP in  
140 IC-21 macrophages (Figure 1C) or primary bone marrow macrophages (data not shown).  
141 Collectively, these *in vitro* data showed that miR-142 targeting sites severely limited

142 expression of the targeted viral genes and that targeting the essential IE3 gene by miR-  
143 142-3p prevented viral replication in hematopoietic cells.

144

145 **Figure 1. MCMV must use infected hematopoietic cells for dissemination in**  
146 **C57BL/6 mice after i.n. inoculation**

147 **A.** Schematic of miR-142-3p targeted viruses (MCMV-IE3-142 and MCMV-GFP-142).

148 Four target sites for miR-142-3p were inserted into the 3' untranslated region of the

149 essential viral gene IE3 or into a GFP-SIINFEKL fusion construct inserted into the IE2

150 locus. Control viruses contain shuttle vector sequences without miR-142-3p target sites in

151 the same location. **B.** Targeting IE3 with miR-142-3p binding sites prevents viral

152 replication in miR-142-3p-expressing macrophages. Multi-step growth curves of the

153 MCMV-IE3-015 control virus and the MCMV-IE3-142 virus in 3T3 fibroblasts and IC-

154 21 macrophages. **C.** Targeting IE3 with miR-142-3p binding sites inhibits gene

155 expression. Regulation of gene expression by miR-142-3p is visualized by GFP

156 expression after infection of 3T3 fibroblasts and IC-21 macrophages with either MCMV-

157 GFP-015 or MCMV-GFP-142 viruses. **D-E.** Productive infection of hematopoietic cells

158 is necessary for viral dissemination after i.n. and f.p. inoculation, but not after i.p.

159 inoculation. Virus titers in the nasal mucosa, lungs and salivary glands at 14 days after i.n.

160 inoculation (**D**) or f.p. or i.p. inoculation (**E**), with  $10^6$  MCMV-IE3-142, or control virus

161 MCMV-IE3-015. Each symbol represents an individual animal. The solid line shows the

162 mean titer, and error bars represent the SEM. Dashed lines show the detection limit (50

163 PFU/g). Data are combined from two independent experiments.

164

165 Recent work has shown that the nasal mucosa is a natural site of MCMV entry [4]. Thus,  
166 we infected C57BL/6 mice by the intranasal route with either MCMV-IE3-142 or control  
167 viruses (either parental wild-type BAC MCMV, or MCMV-IE3-015). All three viruses  
168 replicated at the sites of entry (nasal mucosa and lungs). However, two weeks after  
169 infection, only control viruses were found to be replicating in the SG (Figure 1D). Similar  
170 results were obtained after footpad inoculation, which is considered reflective of infection  
171 via licking skin abrasions or biting, another possible natural route of infection for MCMV  
172 (Figure 1E). In contrast, infection by the i.p. route, which allows hematogenous spread of  
173 cell-free virus [32], enabled MCMV-IE3-142 to replicate robustly in the SG (Figure 1E).  
174 Taken together, these data show that MCMV must utilize infected hematopoietic cells to  
175 efficiently spread to SG after intranasal infection

176

177 **Evasion of MHC-I antigen-presentation and CD8<sup>+</sup> T cells is critical for viral**  
178 **persistence at sites of entry and replication in the salivary gland**

179 Since MCMV had to infect hematopoietic cells to spread to SG after i.n. inoculation, we  
180 considered whether these infected hematopoietic cells must evade immune control in  
181 order to disseminate the virus. MCMV encodes three MHC-I evasion genes (m04, m06  
182 and m152), which collectively interfere with the trafficking of mature MHC-I to the cell  
183 surface and protect infected cells from killing by CD8<sup>+</sup> T cells *in vitro* [14, 16, 21-24].  
184 However, despite clear *in vitro* evidence for the function of these MHC-I evasion genes  
185 [14, 16, 21-24], previous studies on the *in vivo* impact of losing all three MHC-I evasion  
186 genes have revealed only subtle defects in the kinetics of viral replication and clearance,  
187 the size and kinetics of the virus-specific CD8<sup>+</sup> T cell response, or the total latent viral



188 loads after i.p. or f.p infection [25, 26, 28, 33]. Only MCMV's replication in the salivary  
189 glands of CD4<sup>+</sup> T cell deficient mice and its reactivation from latency in explant cultures  
190 have been reported to require these MHC-I evasion gene [29, 30]. To test whether MHC-I  
191 immune evasion genes play an important role after infection of the nasal mucosa, a  
192 natural site of entry, C57BL/6 mice were infected i.n. with either wild-type MCMV (WT-  
193 MCMV) or “Triple Knockout” MCMV (TKO-MCMV) lacking all three MHC-I evasion  
194 genes. While WT-MCMV replicated at the entry sites (nasal mucosa and lungs) from 7  
195 days after infection until the end of the experiment at day 28, and also spread to SG  
196 within 14 days (Figure 2A), TKO-MCMV was controlled at the sites of entry and failed  
197 to spread to SG except in one mouse (Figure 2B). Importantly, depletion of CD8<sup>+</sup> T cells  
198 prior to infection enabled TKO-MCMV to replicate normally and persist for at least 28  
199 days in the nasal mucosa and lungs while also spreading to SG with similar kinetics as  
200 WT-MCMV (Figure 2B). These data clearly show that viral evasion of MHC-I antigen  
201 presentation and CD8<sup>+</sup> T cells is crucial for MCMV to effectively spread to SG from a  
202 natural site of infection.

203

204 **Figure 2. Evasion of MHC-I antigen-presentation and CD8<sup>+</sup> T cells is critical for**  
205 **viral persistence at site of entry and replication in the salivary gland**

206 **A.** Wild-type MCMV persists in the nasal mucosa and spreads to the salivary gland  
207 within 14 days after i.n. infection. Virus titers in the nasal mucosa, lungs and salivary  
208 glands of C57BL/6 mice at 7, 14 and 28 days following i.n. inoculation of WT-MCMV.  
209 Each symbol represents an individual animal. The solid line shows the mean titer, and  
210 error bars represent the SEM. Dashed lines show the detection limit (50 PFU/g). Data are

211 combined from two independent experiments. **B.** Lack of MHC-I evasion genes prevents  
212 viral persistence in the nasal mucosa and spread to the salivary gland. Viral titers in the  
213 nasal mucosa, lungs and salivary gland 7, 14 and 28 days after i.n. inoculation of  
214 C57BL/6 mice infected with TKO-MCMV. Infected mice were treated with an isotype  
215 control antibody or depleted of CD4<sup>+</sup> or CD8<sup>+</sup> T cells before infection. Data are displayed  
216 as in **A** and are combined from two independent experiments. **C.** CD8<sup>+</sup> T cells can  
217 control TKO-MCMV if they are primed in the presence of CD4<sup>+</sup> T cell help. Virus titers  
218 in the indicated organs at day 28 post infection are shown. C57BL/6 mice were depleted  
219 of either CD4<sup>+</sup> T cells or both CD4<sup>+</sup> and CD8<sup>+</sup> T cells, beginning at day 7 after i.n.  
220 infection of TKO-MCMV. Data are displayed as in **A** and are combined from two  
221 independent experiments. **D.** CD8<sup>+</sup> T cells are reduced in frequency after i.n. infection in  
222 the absence of CD4<sup>+</sup> T cell help. Shown is the frequency of viral tetramer-specific CD8<sup>+</sup>  
223 T cells in the blood of recipients at the indicated time points with or without CD4<sup>+</sup> T cell  
224 depletion before infection. Data show the average frequency of T cells at day 7 (n=9-12),  
225 day 14 (n=6-9) and day 28 (n=3-6) after i.n. infection and are derived from one  
226 representative experiment of at least 3 independent experiments. **E.** CD8<sup>+</sup> T cell function  
227 is impaired in the absence of CD4<sup>+</sup> T cell help after i.n. infection, but improved by  
228 delaying CD4<sup>+</sup> T cell depletion until day 7. Each symbol represents an individual animal.  
229 The solid line shows the mean value, and error bars represent the SEM. Data are  
230 combined from two independent experiments.

231

232 Surprisingly, depletion of CD4<sup>+</sup> T cells also reversed the restriction on viral  
233 dissemination, enabling TKO-MCMV to replicate persistently at the entry sites and

234 spread to SG (Figure 2B). In fact, the virus replicated to even higher titers in the salivary  
235 gland in CD4<sup>+</sup> T cell-depleted mice (Figure 2B). CD4<sup>+</sup> T cells are well-known to play a  
236 direct role in the control of MCMV in the salivary gland [34-36] and a recent report has  
237 suggested that MCMV must evade CD4<sup>+</sup> T cells via the viral gene M78 for efficient  
238 dissemination to the salivary gland [37]. However, since none of the three viral genes  
239 missing in TKO-MCMV (m04, m06 and m152) are known to contribute to evasion of  
240 MHC-II or CD4<sup>+</sup> T cells, we wondered whether CD4<sup>+</sup> T cell help was needed to develop  
241 functional CD8<sup>+</sup> T cell responses after i.n. infection, rather than to directly control TKO-  
242 MCMV. This would be unexpected since previous work suggested that CD4<sup>+</sup> T cell help  
243 plays only a modest role in supporting CD8<sup>+</sup> T cells after i.p. infection, primarily  
244 affecting T cell recall capacity and memory inflation [38, 39]. To test this, we depleted  
245 CD4<sup>+</sup> T cells beginning at day 7 after infection, which should allow CD8<sup>+</sup> T cells to be  
246 primed in the presence of CD4<sup>+</sup> T cell help. At this time-point, similar titers of WT-  
247 MCMV and TKO-MCMV were present in the nasal mucosa and lungs, but neither virus  
248 was replicating in the salivary gland (Figure 2A and 2B). This delayed depletion of CD4<sup>+</sup>  
249 T cells enabled control of TKO-MCMV in the nasal mucosa and lungs and prevented any  
250 virus from being detected in the salivary gland (Figure 2C). Control was not due to the  
251 effects of CD4<sup>+</sup> T cells in the first week of infection because double depletion of CD4<sup>+</sup> T  
252 cells and CD8<sup>+</sup> T cells, both beginning on day 7 after infection, restored TKO-MCMV  
253 replication in all tissues (Figure 2C). Thus, delayed depletion of CD4<sup>+</sup> T cells restored  
254 control of TKO-MCMV in a CD8<sup>+</sup> T cell-dependent manner.

255

256 Consistent with a role for CD4<sup>+</sup> T cell help for CD8<sup>+</sup> T cells, CD4<sup>+</sup> T cell depletion prior  
257 to i.n. infection significantly reduced the frequency and number of MCMV-specific CD8<sup>+</sup>  
258 T cells in the blood (Figure 2D & Figure S1A). Representative gating strategies for these  
259 and subsequent data is shown in Figure S2. For precise quantitation of CD8<sup>+</sup> T cell  
260 function per cell we used OT-I T cells stimulated by i.n. infection with MCMV-Ova.  
261 Depletion of CD4<sup>+</sup> T cells prior to infection resulted in impaired cytokine production and  
262 degranulation of OT-Is (Figure S1B). In contrast, delaying depletion of CD4<sup>+</sup> T cells  
263 until day 7 after infection significantly increased the frequency and number of functional  
264 CD8<sup>+</sup> T cells (Figure 2E). Thus, CD4<sup>+</sup> T cell help was critical for the development of  
265 functional CD8<sup>+</sup> T cell responses after i.n. inoculation, which were able to completely  
266 prevent TKO-MCMV from replicating in the salivary gland.

267

### 268 **Early dissemination of TKO-MCMV is restored by NK cell depletion**

269 It was possible that MHC-I evasion genes protected MCMV during dissemination to the  
270 SG or after it arrived. If MHC-I evasion genes were required during dissemination, we  
271 reasoned that we would detect reduced quantities of TKO-MCMV DNA in the SG, which  
272 should be rescued by T cell depletion. To specifically assess viral dissemination rather  
273 than replication after dissemination, we assessed viral DNA load in the SG 4 days after  
274 i.n. inoculation, a time point at which virus-specific CD8<sup>+</sup> T cells can be detected in  
275 draining lymph nodes, but not yet in the SG (Figure 3A). Indeed, the TKO-MCMV DNA  
276 load was approximately 10-fold reduced compared to WT-MCMV in unmanipulated  
277 C57BL/6 mice (Figure 3B). However, when CD8<sup>+</sup> T cells, CD4<sup>+</sup> T cells or both CD4<sup>+</sup>  
278 and CD8<sup>+</sup> T cells were depleted, TKO DNA load was only marginally increased (about

279 2-fold) and this did not reach significance (Figure 3B). Moreover, TKO-MCMV DNA  
280 was present in similar amounts in draining lymph nodes (mandibular LNs, deep cervical  
281 LNs and mediastinal LNs [40, 41]) with or without CD8<sup>+</sup> T cells (Figure 3C). These data  
282 show that dissemination of TKO-MCMV is markedly impaired, but suggest that T cells  
283 are not principally responsible, despite their effects on TKO-MCMV persistence in the  
284 nasal mucosa and lungs, and replication in the salivary gland (Figure 2). However,  
285 depletion of NK cells alone or NK cells and T cells from C57BL/6 mice resulted in  
286 complete restoration of early TKO-MCMV dissemination to the salivary gland (Figure  
287 3B). Moreover, mice deficient in either perforin or IFN- $\gamma$  completely failed to restrict  
288 TKO-MCMV dissemination (Figure 3D). Thus, NK cells strongly limited the  
289 dissemination of TKO-MCMV through a mechanism that required both perforin and  
290 IFN- $\gamma$ . In contrast, depletion of NK cells did not rescue MCMV replication in the salivary  
291 gland by day 14 (Figure 3E), unlike depletion of T cells (Figure 2B). Together, these data  
292 show that the MHC-I/NKG2D evasion genes are required to escape NK cell responses  
293 during dissemination in hematopoietic cells and to escape T cell responses during  
294 replication in the salivary gland.

295

### 296 **Figure 3. Early dissemination of TKO-MCMV is impaired by NK cells**

297 **A.** MCMV-specific T cells are not present in the salivary gland by day 4 after i.n.  
298 infection. Representative FACS plots show OT-I cells in the blood, draining LNs  
299 (ManLNs, DCLNs and MLNs) and SG 4 days after i.n. infection with MCMV-OVA.  
300 Data show cells in one representative mouse from one experiment. **B.** NK cells, but not T  
301 cells, prevent dissemination of TKO-MCMV to the salivary gland after i.n. infection of

302 C57BL/6 mice. C57BL/6 mice were depleted of the indicated cells before i.n. inoculation  
303 with TKO-MCMV. Shown are viral DNA copies in the SG 4 days after infection. Each  
304 symbol represents an individual animal. The solid line shows the mean value, and error  
305 bars represent the SEM. Data are combined from two independent experiments for each  
306 condition. **C.** CD8<sup>+</sup> T cell depletion does not change the TKO-MCMV DNA loads in  
307 draining LNs (ManLNs, DCLNs and MLNs). CD8<sup>+</sup> T cells were depleted or not from  
308 C57BL/6 mice. Shown are viral DNA copies in the indicated lymph nodes at 3 days post  
309 infection. Data are displayed as in **B** and are combined from 2 independent experiments.  
310 **D.** IFN- $\gamma$  and perforin are essential to prevent dissemination of TKO-MCMV. Shown are  
311 copies of viral DNA in the SG following i.n. infection with either TKO-MCMV or WT-  
312 MCMV of mice lacking IFN- $\gamma$  or perforin. Data are displayed as in **B** and are combined  
313 from 2 independent experiments. **E.** NK cell depletion before infection does not rescue  
314 TKO-MCMV replication in the salivary glands after i.n. infection of C57BL/6 mice.  
315 Shown are virus titers in the nasal mucosa, lungs and salivary glands at 14 days post  
316 infection. Data are displayed as in **B** and are from one experiment.

317

### 318 **NK cells and T cells enforce the need for hematopoietic cell dissemination**

319 Thus far, our data indicate that MCMV dissemination after i.n. inoculation required  
320 infection of both hematopoietic cells and the MHC-I evasion genes in C57BL/6 mice.  
321 However, depletion of NK cells and not T cells rescued dissemination of TKO MCMV to  
322 the salivary gland. C57BL/6 mice are resistant to MCMV infection as a result of  
323 activation of Ly49H<sup>+</sup> NK cells by viral m157 [42, 43]. Therefore, we wondered whether  
324 TKO-MCMV would spread more efficiently in BALB/c mice, which lack Ly49H-

325 expression and robust NK cell responses. Indeed, TKO-MCMV readily spread to the SG  
326 in BALB/c mice by day 14 (Figure 4A). Even more remarkably, MCMV-IE3-142 virus  
327 was also able to spread to the SG in BALB/c mice and replicate there within 14 days of  
328 infection (Figure 4B). Thus MCMV did not need to infect hematopoietic cells or express  
329 MHC-I evasion genes to reach the salivary gland in BALB/c mice. If this effect was  
330 mediated by the NK cell response, we should be able to restore MCMV-IE3-142 spread  
331 to the SG in C57BL/6 mice simply by depleting NK cells. Indeed, depletion of NK cells  
332 from C57BL/6 mice prior to i.n. infection allowed MCMV-IE3-142 to reach the SG in  
333 nearly all (11 of 12) mice (Figure 4C). Moreover, it accelerated viral dissemination and  
334 led to increased copies of MCMV-IE3-142 DNA in the SG as early as day 4 after  
335 infection, with no significant difference in viral DNA loads in the SG between BALB/c  
336 mice and C57BL/6 mice lacking NK cells (Figure 4D). Thus, the requirement for  
337 dissemination within infected hematopoietic cells was dictated by the NK cell response in  
338 C57BL/6 mice. Interestingly, depletion of CD4<sup>+</sup> and CD8<sup>+</sup> T cells from C57BL/6 mice  
339 also partially rescued MCMV-IE3-142 dissemination, allowing salivary gland replication  
340 in 5 of 12 mice (Figure 4C), but did not result in increased viral DNA loads by day 4 after  
341 infection (Figure 4D). Thus, in the absence of T cell responses MCMV-IE3-142 could  
342 eventually reach the SG without using hematopoietic cells in some mice, but the early  
343 dissemination was unaffected. Together, these data suggest that early control of MCMV  
344 by NK cells forced MCMV to infect and utilize hematopoietic cells for dissemination and  
345 that MHC-I/NKG2D evasion genes were required to avoid early NK cell control during  
346 dissemination and to productively infect the SG after arrival.

347

348 **Figure 4. NK cells and T cells enforce the need for hematopoietic cell dissemination**

349 **A.** MCMV does not require MHC-I evasion to reach the salivary gland after i.n. infection  
350 of BALB/c mice. Virus titers in the nasal mucosa, lungs and SG of BALB/c mice at 14  
351 dpi after i.n. inoculation of TKO-MCMV. Each symbol represents an individual animal.  
352 The solid line shows the mean value, and error bars represent the SEM. Dashed lines  
353 show the detection limit (50 PFU/g). Data are combined from at least two independent  
354 experiments. **B.** MCMV does not require infection of hematopoietic cells to reach the  
355 salivary gland after i.n. infection of BALB/c mice. Shown are virus titers in the nasal  
356 mucosa, lungs and SG of BALB/c mice 14 days after i.n. inoculation of MCMV-IE3-142.  
357 Data are displayed as in **A.** **C.** Depletion of NK cells or T cells from C57BL/6 mice  
358 enables viral dissemination from the nasal mucosa to the salivary gland without infection  
359 of hematopoietic cells. C57BL/6 mice were depleted of NK cells or CD4<sup>+</sup> T cells and  
360 CD8<sup>+</sup> T cells before i.n. infection with MCMV-IE3-142. Shown are the viral titers in the  
361 nasal mucosa, lungs and SG 14 days after infection. Data are displayed as in **A.** **D.** Early  
362 viral dissemination is affected by NK cell responses. BALB/c mice or C57BL/6 mice  
363 with or without depletion of either NK cells or CD4<sup>+</sup> and CD8<sup>+</sup> T cells were i.n.  
364 inoculated with MCMV-IE3-142. Shown are viral DNA copies in the SG at 4 dpi after  
365 infection.

366

367 **Discussion**

368 Over the last 6 decades, nearly all work with MCMV, as well as other animal models of  
369 CMV infection, have utilized non-physiological routes of inoculation including i.p., i.v.,  
370 s.c. and f.p., with a few studies utilizing an i.n. route to study mucosal infection. However,



371 recent work directly showed that natural MCMV transmission from infected mothers to  
372 pups occurs through the nasal mucosa [4]. Moreover, human CMV is thought to infect  
373 via an oral/nasal route and it has been proposed that the nasal mucosa may be the  
374 dominant site of entry [4]. Very little is known about the immune response or viral  
375 dissemination after a nasal infection and our data reveal a surprisingly complex and  
376 previously unappreciated host/pathogen relationship after intranasal inoculation of mice  
377 with MCMV. First, and most surprisingly, we found that strong NK cell responses during  
378 primary viral infection forced MCMV to use infected hematopoietic cells for  
379 dissemination from the entry sites (nasal mucosa and lungs). A lack of NK cells or  
380 infection of BALB/c mice enabled non-hematopoietic viral dissemination. Second, our  
381 data suggest that MHC-I/NKG2D evasion genes were critical to enable efficient  
382 dissemination to the SG and that the impaired dissemination could be restored by  
383 depletion of NK cells. Third, we found that MHC-I/NKG2D evasion was required for  
384 MCMV to evade T cell responses in order to persist in the nasal mucosa and replicate in  
385 the salivary gland. Finally, our data show that CD4<sup>+</sup> T cell help was required to produce  
386 functional and protective CD8<sup>+</sup> T cells after such mucosal infection. Overall, these data  
387 describe a previously unappreciated host/pathogen relationship that develops after  
388 infection by the nasal route.

389

390 Our data are the first to describe a vital role for MCMV's MHC-I evasion genes during  
391 primary CMV infection. Previous work in the MCMV model described subtle  
392 improvements in viral fitness and latent loads as a result of CD8<sup>+</sup> T cell evasion, but no  
393 severe defects in infection or dissemination for viruses lacking all 3 known MHC-I

394 evasion genes (m04, m06 and m152) [25-28]. Only MCMV's replication in the salivary  
395 glands of CD4<sup>+</sup> T cell deficient mice and its reactivation from latency in explant cultures  
396 have been reported to require these MHC-I evasion genes [29, 30]. However, like most  
397 previous studies of MCMV immunobiology, these studies all utilized routes of infection  
398 (i.p., i.v. or f.p.) that involve breaking or avoiding a barrier tissue and allow MCMV to  
399 directly infect cells in the spleen [5, 6, 8]. This indicates that MCMV likely had direct  
400 access to the blood from the site of inoculation. One previous study showed a critical *in*  
401 *vivo* role for evasion of CD8<sup>+</sup> T cells by RhCMV after subcutaneous infection, but only if  
402 animals were previously infected with RhCMV and therefore contained a robust and pre-  
403 existing T cell response [7]. In contrast, our data show that primary MCMV infection via  
404 a natural mucosal barrier tissue necessitated the expression of these genes in order for the  
405 virus to persist in the nasal mucosa, disseminate to the salivary gland and replicate in the  
406 salivary gland. As might be predicted, these genes protected MCMV from T cells during  
407 replication in the nasal mucosa and salivary gland (Figure 2). In this context, it is  
408 interesting to note that recent work identified the viral M78 protein as responsible for  
409 reducing MHC-II expression on infected cells, which was required for efficient infection  
410 of the salivary gland after intranasal inoculation [37]. Unexpectedly however,  
411 dissemination from the nasal mucosa to the salivary gland required the m04, m06 and  
412 m152 genes to limit NK cell control of the virus. Previous work has shown that the m04  
413 and m152 genes contribute to evasion of NK cell responses [17-20, 44-46]. The m04  
414 protein complexes with MHC-I and allows increased surface expression of total MHC-I  
415 even in cells expressing m152 and m06, to avoid NK cell activation [17]. In addition, the  
416 m152 gene down-regulates the RAE-1 ligands for the NKG2D activating receptor,

417 consequently inhibiting NK cell responses [19, 20, 44-46]. Future work will be needed to  
418 define the individual roles of viral m04 and/or m152 in improving viral dissemination.  
419 Together, these data suggest that MCMV's MHC-I/NKG2D evasion genes play a vital  
420 role in avoiding NK cells during hematopoietic cell-mediated spread from mucosal  
421 tissues to the salivary gland, while also protecting replicating MCMV from T cells within  
422 mucosal tissues.

423

424 We were most surprised to find that, even in the presence of m04, m06 and m152, NK  
425 cells forced MCMV to use hematopoietic cells as carriers in C57BL/6 mice. Previous  
426 work has described hematopoietic cells, including monocytes, macrophages and dendritic  
427 cells, as important carriers for CMV dissemination [4, 9, 13, 47, 48]. Our miR-142-3p  
428 targeted strains could not replicate in hematopoietic cells and could not disseminate to the  
429 salivary gland in intact C57BL/6 mice (Figure 1). Importantly, this was also true after f.p.  
430 infection, but not i.p. infection, indicating that the route of infection dictated the necessity  
431 for hematopoietic involvement. These results are consistent with a recent report showing  
432 that MCMV used dendritic cells to disseminate to the SG after i.n. inoculation [13] and  
433 previous work showing that recruitment of monocytes to the footpad was key for efficient  
434 dissemination after f.p. infection [9-12]. However, depletion of NK cells removed the  
435 need for hematopoietic cell infection in order for MCMV to disseminate to the salivary  
436 gland (Figure 4C). This dramatic effect is likely due to the interaction of host Ly49H (in  
437 C57BL/6 mice) and viral m157, as hematopoietic cell infection was not needed in  
438 BALB/c mice (Figure 4A). NK cell activating and inhibitory receptor expression varies  
439 greatly across genetically diverse populations [49], and other NK cell activating receptors

440 are known to be triggered by MCMV-infected cells (e.g. Ly49P<sup>MA/My</sup>, Ly49P1, Ly49D2,  
441 and Ly49L) [50]. Moreover, the specific combination of inhibitory and activating  
442 receptors may affect the outcomes as shown by data that the inhibitory Ly49C could  
443 inhibit the activation of NK cells through Ly49H [51]. Thus, it is likely that NK cells and  
444 viral immune evasion genes play a variable role across an outbred population in  
445 regulating the route and pace of viral dissemination after natural infection.

446

447 Although our study revealed a critical role for hematopoietic cell infection for  
448 dissemination in C57BL/6 mice, it is not clear how MCMV disseminates from the nasal  
449 mucosa when NK cells or T cells were depleted or in BALB/c mice. NK cell depletion  
450 clearly improved the dissemination efficiency of TKO-MCMV (Figure 3) and MCMV-  
451 IE3-142 (Figure 4) in C57BL/6 mice, resulting in increased viral DNA loads in the  
452 salivary gland by day 4 after infection. The ability of these viruses to reach the salivary  
453 gland after NK cell depletion or in BALB/c mice may imply that it can disseminate by  
454 cell-free viremia, or perhaps by infected endothelial cells that are sloughed into the blood  
455 stream as they become cytomegalic, a mechanism that was first proposed by Goodpasture  
456 and Talbot almost 100 year ago [52]. Future work will be aimed at defining the source of  
457 virus that arrives in the salivary gland in each of these settings.

458

459 Our data also unexpectedly revealed a critical role for CD4<sup>+</sup> T cell help after i.n.  
460 inoculation. Although CD4<sup>+</sup> T cell help for CD8<sup>+</sup> T cells is well established in multiple  
461 infectious models (e.g. [53-66]), previous work in the MCMV model had shown that  
462 CD4<sup>+</sup> T cell-deficient mice mounted a remarkably intact CD8<sup>+</sup> T cell response to MCMV

463 after i.p. or i.v. inoculation [29, 39, 67]. However, after i.n. infection, mice lacking CD4<sup>+</sup>  
464 T cells produced few functional anti-viral CD8<sup>+</sup> T cells and were unable to limit the  
465 dissemination of TKO-MCMV (Figure 2). Previous work has suggested that MCMV-  
466 specific CD8<sup>+</sup> T cells are primed by cross-presentation after i.p. inoculation [68, 69], a  
467 route of infection that produces high viral titers in the first few days of infection. In  
468 contrast, it is possible that CD8<sup>+</sup> T cell priming after i.n. infection relies more heavily on  
469 direct presentation. Alternatively, cross-presenting dendritic cells in the draining lymph  
470 nodes after i.n. MCMV infection may depend on CD4<sup>+</sup> T cell help for activation and  
471 licensing. Future work will be needed to dissect the specific requirements for CD4<sup>+</sup> T  
472 cells after i.n. infection.

473

474 Collectively, our data suggest that MCMV is forced by early NK cell responses, and even  
475 somewhat by T cell responses, to use the hematopoietic cells for dissemination from the  
476 nasal mucosa and lungs. In this setting, the m04, m06 and m152 evasion genes became  
477 vital for MCMV to evade NK cell responses to efficiently reach the salivary gland, where  
478 they continued to need the three evasion genes to avoid T cell responses and replicate.  
479 These data provide the first *in vivo* evidence for a vital role of these immune evasion  
480 genes in wild-type, previously uninfected animals and also describe how MCMV can  
481 avoid NK cell pressure by utilizing hematopoietic cells to facilitate dissemination.

482

## 483 **Experimental methods**

### 484 **Mice**

485 Six to seven-week old mice were used for all experiments. C57BL/6J mice and BALB/c  
486 mice were purchased from the Jackson Laboratory and used directly. OT-I transgenic  
487 mice (C57BL/6-Tg(TcraTcrb)1100Mjb/J), CD45.1 mice (B6.SJL-Ptprc<sup>a</sup> Pepc<sup>b</sup>/BoyJ),  
488 IFN- $\gamma$  knock-out mice (B6.129S7-Ifng<sup>tm1Ts</sup>/J) and perforin knock-out mice (C57BL/6-  
489 Prf1<sup>tm1Sdz</sup>/J) were purchased from the Jackson Laboratory and maintained in our animal  
490 colony. Protocols were approved by the institutional animal care and use committee of  
491 Thomas Jefferson University. All mice were housed in a standard pathogen-free animal  
492 facility.

493

#### 494 **Viruses**

495 Murine cytomegalovirus strains including the wild-type BAC-derived MCMV strain  
496 (MW97.01, called WT-MCMV throughout) [70], TKO-MCMV strain (triple knock out  
497 of m04, m06 and m152) [27] and MCMV-Ova (which expresses the cognate SIINFEKL  
498 peptide) have been previously described [71, 72]. They were propagated in M2-10B4  
499 cells as previously described [73].

500

#### 501 **Cell culture**

502 M2-10B4 cell line was purchased from ATCC. M2-10B4 cells were cultured in growth  
503 media (RPMI-1640 medium with L-glutamine (Mediatech/Cellgro, reference #: 10-040-  
504 CV), supplemented with 10% FBS and 100 units/ml Penicillin, 100  $\mu$ g/ml Streptomycin)  
505 at 37°C with 5% carbon dioxide.

506

#### 507 **Experimental infection**

508 Mice under anesthesia were either infected by the i.n. route with  $10^6$  PFU MCMV in 20  
509  $\mu$ L PBS (10  $\mu$ L per nare), by the i.p. route with  $10^6$  PFU MCMV in 100  $\mu$ L PBS, or by  
510 the f.p. route with  $10^6$  PFU MCMV in 30  $\mu$ L PBS. All experiments were approved by the  
511 Thomas Jefferson University Institutional Animal Care and Use Committee.

512

### 513 **Generation of miR-142 cell tropism specific MCMV virus**

514 miR-142 virus and control virus were constructed using the  $\lambda$ -derived linear  
515 recombination system in combination with the pSM3fr MCMV bacterial artificial  
516 chromosome in the *Escherichia coli* strain DY380 [74]. Sequence containing 4  
517 repeated target sequences with complete complementarity to miR-142-3p were  
518 synthesized and inserted 86 bases into the 3'UTR of the IE3 gene (nucleotide  
519 coordinate - 177898) of MCMV using linear recombination. Vector sequence  
520 containing the FRT flanked kanamycin cassette was inserted into the same region,  
521 with the kanamycin cassette removed from both viruses by FLP recombination.  
522 miR-142-3p target sequence with complementary sequences highlighted with  
523 underline – AGTCGACTCCATAAAGTAGGAAACACTACACGATTCCATAAAGT  
524 AGGAAACACTACAACCGGTTCCATAAAGTAGGAAACACTACACGATTCCATA  
525 AAGTAGGAAACACTACAACCGGT. The recombinant viruses have been checked for  
526 insertion by restriction analysis, Southern blotting, and sequencing.

527

### 528 **Multi-step growth curves *in vitro***

529  $3 \times 10^5$  IC-21 macrophages or  $2 \times 10^5$  3T3-fibroblasts were separately seeded into 6-well  
530 plates. One day later, cells were infected with either MCMV-IE3-142 or MCMV-IE3-015

531 at a multiplicity of infection (moi) equalling 0.1 for 2 hours without centrifugal  
532 enhancement. After 2 hours, supernatant was collected for input virus titer (labelled day -  
533 1) and cells were washed with fresh media. Cells were scraped from duplicate wells  
534 immediately after the wash (day 0) and on days 1, 3, 5 and 7 after infection.

535

### 536 **Detection of GFP expression by flow cytometry**

537 To visualize the regulation of gene expression by miR-142-3p, MCMV-GFP-142 and  
538 MCMV-GFP-015 were used to infect IC-21 macrophages or 3T3-fibroblasts respectively  
539 with moi = 0.5, 3 or 10. The following day, cells were fixed and collected to determine  
540 GFP expression by flow cytometry.

541

### 542 **Cell depletions *in vivo***

543 In some experiments, CD4<sup>+</sup> T cells, CD8<sup>+</sup> T cells and/or NK cells were depleted 3 days  
544 before infection or 7 days after infection. Depletions were conducted by i.p. injection on  
545 days 3, 2 and 1 before infection or 7, 8 and 9 days after infection using 0.2 mg of anti-  
546 mouse CD4 mAb (clone GK1.5), anti-mouse CD8 $\beta$  mAb (clone 53-5.8) and/or anti-  
547 mouse NK1.1 mAb (clone PK136). Depletions were then maintained for the duration of  
548 the experiment by weekly injections with 0.15 mg (GK1.5) or 0.2mg (PK136 and 53-5.8)  
549 of antibody. All depleting antibodies were purchased from Bio-x-Cell. Depletions were  
550 confirmed by staining for CD4 (clone RM4-4), CD8 $\alpha$  (clone 53-6.7) or NKp46 (clone  
551 29A1.4).

552

### 553 **Virus titration**



554 Nasal mucosa, lungs and salivary glands (SG) were collected at indicated time points post  
555 infection and frozen. Nasal mucosa was collected as previously described [40]. Twenty  
556 percent homogenates (w/v) were prepared from each collected tissue for virus  
557 quantification by plaque assay [40]. Briefly, tissues were weighed and homogenized  
558 using a pestle with a small amount of sterile sand in a 1.5 ml centrifuge tube, then  
559 suspended with RPMI supplemented with 10% FBS, 100 Units/mL penicillin, and 100  
560  $\mu\text{g/mL}$  streptomycin. Supernatants from the homogenate were collected after  
561 centrifugation (2400 xg, 10 min) and viral plaque assay was performed on M2-10B4 cells.

562

### 563 **Adoptive transfer of OT-I T cells**

564 For adoptive transfer of OT-I T cells we used OT-I transgenic mice expressing CD45.1 as  
565 donor cells. Splenocytes containing 5000 OT-I cells from naïve transgenic mice were  
566 injected i.v. into sex-matched congenic recipients via the retro-orbital sinus suspended in  
567 100  $\mu\text{l}$  PBS. The following day, recipients were i.n. infected with  $10^6$  PFU MCMV-Ova.

568

### 569 **Lymphocytes isolation, antibodies, tetramer staining, intracellular cytokine 570 stimulation (ICS) and FACS analysis**

571 Lymphocytes from the blood were collected from the retro-orbital sinus and mixed with  
572 10  $\mu\text{l}$  heparin (1000 units/ml). Lymphocytes from the spleen were collected by  
573 homogenization of the spleen through a 70  $\mu\text{M}$  filter and suspended in T cell medium  
574 (RPMI-1640 medium with L-glutamine, 10% FBS, 100 units/ml Penicillin, 100  $\mu\text{g/ml}$   
575 Streptomycin, and  $5 \times 10^{-5}\text{M}$   $\beta$ -mercaptoethanol).  $\text{CD4}^+$  and  $\text{CD8}^+$  T cells were identified  
576 by antibodies specific for CD3 (clone 17A2), TCR $\beta$  (clone H57-597), CD4 (clone RM4-4)

577 and CD8 $\alpha$  (clone 53-6.7). OT-I donor cells were further distinguished from recipient  
578 cells by CD45.1 (clone A20) and TCR V $\alpha$ 2 (clone B20.1). MHC-I-tetramers loaded with  
579 peptides from M45 and M38 were generated at the NIH tetramer core facility  
580 (<http://tetramer.yerkes.emory.edu/>) and used to identify MCMV-specific CD8<sup>+</sup> T cells as  
581 described previously [75]. For assessment of cytokine production after stimulation,  
582 splenocytes were stimulated with 1  $\mu$ g/ml M38<sub>316-323</sub> peptide (Genemed Synthesis, Inc), 1  
583  $\mu$ g/ml Brefeldin A (GolgiPlug, BD, Bioscience) in the presence of antibody specific for  
584 CD107a (clone 1D4B) at 37°C for 3 hours. Cells were chilled on ice, and live cells were  
585 discriminated with Zombie Aqua (Biolegend) prior to staining for expression of CD3  
586 (clone 17A2), and CD8 $\alpha$  (clone 53-6.7). Finally, splenocytes were fixed and  
587 permeabilized with Cytofix/Cytoperm (BD Biosciences), following the manufacturer's  
588 instructions, and stained for intracellular TNF- $\alpha$  (clone MP6-XT22) and IFN- $\gamma$  (clone  
589 XMG1.2). All antibodies were purchased from Biolegend and cells were collected on BD  
590 Fortessa and analyzed with FlowJo software (TreeStar).

591

## 592 **DNA extraction and quantitative real-time PCR (qPCR)**

593 For extracting DNA from the SG, 50  $\mu$ l from a twenty percent homogenate (w/v) was  
594 used. For mandibular lymph nodes (manLNs), deep cervical lymph nodes (DCLNs) and  
595 mediastinal lymph nodes (MLNs), the whole lymph node was used after homogenization  
596 in RPMI-1640 medium using a pair of needles. In both cases, DNA was extracted from  
597 the whole lymph node and SG using the Puregene core kit A (Qiagen) and following the  
598 manufacturer's instructions for extraction of DNA from tissues. RNA was removed by  
599 adding RNase A solution and DNA was eluted with 30  $\mu$ l distilled water. Extracted DNA

600 was quantified by nanodrop and two microliters DNA were used as a template in each  
601 qPCR reaction. The qPCR targeting MCMV-E1 gene was performed as previously  
602 described [68]. The genome copy numbers were calculated based on a standard curve of a  
603 plasmid containing the MCMV-E1 gene.

604

### 605 **Statistical analysis**

606 Data in all experiments is pooled from at least two independent experiments. Error bars  
607 represent the standard error of the mean (SEM) unless specified otherwise in the figure  
608 legend. A two-tailed Student's t test was used for statistical analysis for pairwise  
609 comparisons. All data analyses were performed in Graphpad Prism 6. For all statistical  
610 analysis, \* $p < 0.05$ , \*\* $p < 0.01$ , \*\*\* $p < 0.005$ .

611

### 612 **Acknowledgments**

613 This work was supported by grant AI106810 awarded to C.M.S.

614

### 615 **Author contributions**

616 S.C.Z., C.M.S. and F.G. conceived of the study. S.C.Z. and C.M.S. performed the  
617 experiments. F.G. designed and constructed the MCMV-IE3-142 and MCMV-GFP-142  
618 as well as control viruses, and confirmed miR-1423p expression in macrophages. All  
619 authors contributed to the manuscript preparation.

620

### 621 **Declaration of interests**

622 The authors declare no competing interests.

623

624

625

626 **References:**

- 627 1. Mussi-Pinhata, M.M., et al., *Birth prevalence and natural history of congenital*  
628 *cytomegalovirus infection in a highly seroimmune population*. Clin Infect Dis,  
629 2009. **49**(4): p. 522-8.
- 630 2. Manicklal, S., et al., *The "silent" global burden of congenital cytomegalovirus*.  
631 Clin Microbiol Rev, 2013. **26**(1): p. 86-102.
- 632 3. Kenneson, A. and M.J. Cannon, *Review and meta-analysis of the epidemiology*  
633 *of congenital cytomegalovirus (CMV) infection*. Rev Med Virol, 2007. **17**(4): p.  
634 253-76.
- 635 4. Farrell, H.E., et al., *Murine Cytomegalovirus Exploits Olfaction To Enter New*  
636 *Hosts*. MBio, 2016. **7**(2): p. e00251-16.
- 637 5. Hsu, K.M., et al., *Murine cytomegalovirus displays selective infection of cells*  
638 *within hours after systemic administration*. Journal of General Virology, 2009.  
639 **90**(1): p. 33-43.
- 640 6. Sacher, T., et al., *The major virus-producing cell type during murine*  
641 *cytomegalovirus infection, the hepatocyte, is not the source of virus*  
642 *dissemination in the host*. Cell host & microbe, 2008. **3**(4): p. 263-272.
- 643 7. Hansen, S.G., et al., *Evasion of CD8+ T cells is critical for superinfection by*  
644 *cytomegalovirus*. Science, 2010. **328**(5974): p. 102-6.
- 645 8. Farrell, H.E., et al., *Lymph Node Macrophages Restrict Murine Cytomegalovirus*  
646 *Dissemination*. J Virol, 2015. **89**(14): p. 7147-58.
- 647 9. Daley-Bauer, L.P., et al., *Cytomegalovirus hijacks CX3CR1(hi) patrolling*  
648 *monocytes as immune-privileged vehicles for dissemination in mice*. Cell Host  
649 Microbe, 2014. **15**(3): p. 351-62.
- 650 10. Noda, S., et al., *Cytomegalovirus MCK-2 controls mobilization and recruitment*  
651 *of myeloid progenitor cells to facilitate dissemination*. Blood, 2006. **107**(1): p.  
652 30-8.
- 653 11. Saederup, N., et al., *Cytomegalovirus-encoded beta chemokine promotes*  
654 *monocyte-associated viremia in the host*. Proc Natl Acad Sci U S A, 1999.  
655 **96**(19): p. 10881-6.
- 656 12. Saederup, N., et al., *Murine cytomegalovirus CC chemokine homolog MCK-2*  
657 *(m131-129) is a determinant of dissemination that increases inflammation at*  
658 *initial sites of infection*. Journal of virology, 2001. **75**(20): p. 9966-9976.
- 659 13. Farrell, H.E., et al., *Murine Cytomegalovirus Spreads by Dendritic Cell*  
660 *Recirculation*. MBio, 2017. **8**(5).
- 661 14. Lemmermann, N.A., et al., *Immune evasion proteins of murine cytomegalovirus*  
662 *preferentially affect cell surface display of recently generated peptide*  
663 *presentation complexes*. J Virol, 2010. **84**(3): p. 1221-36.

- 664 15. Lemmermann, N.A., et al., *In vivo impact of cytomegalovirus evasion of CD8 T-*  
665 *cell immunity: facts and thoughts based on murine models.* Virus Res, 2011.  
666 **157**(2): p. 161-74.
- 667 16. Lemmermann, N.A., et al., *Murine cytomegalovirus immune evasion proteins*  
668 *operative in the MHC class I pathway of antigen processing and presentation:*  
669 *state of knowledge, revisions, and questions.* Med Microbiol Immunol, 2012.  
670 **201**(4): p. 497-512.
- 671 17. Babic, M., et al., *Cytomegalovirus immunoevasin reveals the physiological role*  
672 *of "missing self" recognition in natural killer cell dependent virus control in*  
673 *vivo.* J Exp Med, 2010. **207**(12): p. 2663-73.
- 674 18. Brizic, I., et al., *MCMV avoidance of recognition and control by NK cells.* Semin  
675 Immunopathol, 2014. **36**(6): p. 641-50.
- 676 19. Lodoen, M., et al., *NKG2D-mediated natural killer cell protection against*  
677 *cytomegalovirus is impaired by viral gp40 modulation of retinoic acid early*  
678 *inducible 1 gene molecules.* J Exp Med, 2003. **197**(10): p. 1245-53.
- 679 20. Krmptotic, A., et al., *MCMV glycoprotein gp40 confers virus resistance to CD8+*  
680 *cells and NK cells in vivo.* Nat Immunol, 2002. **3**(6): p. 529-35.
- 681 21. Yewdell, J.W. and A.B. Hill, *Viral interference with antigen presentation.* Nat  
682 Immunol, 2002. **3**(11): p. 1019-25.
- 683 22. Pinto, A.K., et al., *Coordinated function of murine cytomegalovirus genes*  
684 *completely inhibits CTL lysis.* J Immunol, 2006. **177**(5): p. 3225-34.
- 685 23. Holtappels, R., et al., *Cytomegalovirus encodes a positive regulator of antigen*  
686 *presentation.* J Virol, 2006. **80**(15): p. 7613-24.
- 687 24. Kavanagh, D.G., et al., *The multiple immune-evasion genes of murine*  
688 *cytomegalovirus are not redundant: m4 and m152 inhibit antigen presentation*  
689 *in a complementary and cooperative fashion.* J Exp Med, 2001. **194**(7): p. 967-  
690 78.
- 691 25. Gold, M.C., et al., *Murine cytomegalovirus interference with antigen*  
692 *presentation has little effect on the size or the effector memory phenotype of*  
693 *the CD8 T cell response.* J Immunol, 2004. **172**(11): p. 6944-53.
- 694 26. Bohm, V., et al., *The immune evasion paradox: immunoevasins of murine*  
695 *cytomegalovirus enhance priming of CD8 T cells by preventing negative*  
696 *feedback regulation.* J Virol, 2008. **82**(23): p. 11637-50.
- 697 27. Wagner, M., et al., *Major histocompatibility complex class I allele-specific*  
698 *cooperative and competitive interactions between immune evasion proteins of*  
699 *cytomegalovirus.* J Exp Med, 2002. **196**(6): p. 805-16.
- 700 28. Lu, X., et al., *Murine cytomegalovirus interference with antigen presentation*  
701 *contributes to the inability of CD8 T cells to control virus in the salivary gland.* J  
702 Virol, 2006. **80**(8): p. 4200-2.
- 703 29. Walton, S.M., et al., *Absence of cross-presenting cells in the salivary gland and*  
704 *viral immune evasion confine cytomegalovirus immune control to effector CD4*  
705 *T cells.* PLoS Pathog, 2011. **7**(8): p. e1002214.
- 706 30. Bohm, V., et al., *Immune evasion proteins enhance cytomegalovirus latency in*  
707 *the lungs.* J Virol, 2009. **83**(19): p. 10293-8.

- 708 31. Zhang, S., et al., *Comparison of the pathogenesis of the highly passaged MCMV*  
709 *Smith strain with that of the low passaged MCMV HaNa1 isolate in BALB/c*  
710 *mice upon oronasal inoculation.* Vet Res, 2015. **46**: p. 94.
- 711 32. Hsu, K.M., et al., *Murine cytomegalovirus displays selective infection of cells*  
712 *within hours after systemic administration.* J Gen Virol, 2009. **90**(Pt 1): p. 33-  
713 43.
- 714 33. Munks, M.W., et al., *Viral interference with antigen presentation does not alter*  
715 *acute or chronic CD8 T cell immunodominance in murine cytomegalovirus*  
716 *infection.* J Immunol, 2007. **178**(11): p. 7235-41.
- 717 34. Jonjić, S., et al., *Antibodies are not essential for the resolution of primary*  
718 *cytomegalovirus infection but limit dissemination of recurrent virus.* Journal of  
719 Experimental Medicine, 1994. **179**(5): p. 1713-1717.
- 720 35. Humphreys, I.R., et al., *Cytomegalovirus exploits IL-10-mediated immune*  
721 *regulation in the salivary glands.* Journal of Experimental Medicine, 2007.  
722 **204**(5): p. 1217-1225.
- 723 36. Jonjic, S., et al., *Efficacious control of cytomegalovirus infection after long-term*  
724 *depletion of CD8+ T lymphocytes.* J Virol, 1990. **64**(11): p. 5457-64.
- 725 37. Yunis, J., et al., *Murine cytomegalovirus degrades MHC class II to colonize the*  
726 *salivary glands.* PLoS Pathog, 2018. **14**(2): p. e1006905.
- 727 38. Snyder, C.M., et al., *CD4+ T cell help has an epitope-dependent impact on CD8+*  
728 *T cell memory inflation during murine cytomegalovirus infection.* The Journal  
729 of Immunology, 2009: p. jimmunol. 0900227.
- 730 39. Walton, S.M., et al., *T-cell help permits memory CD8(+) T-cell inflation during*  
731 *cytomegalovirus latency.* Eur J Immunol, 2011. **41**(8): p. 2248-59.
- 732 40. Zhang, S., et al., *Persistent viral replication and the development of T-cell*  
733 *responses after intranasal infection by MCMV.* Med Microbiol Immunol, 2019.
- 734 41. Zhang, S., et al., *Pattern of circulation of MCMV mimicking natural infection*  
735 *upon oronasal inoculation.* Virus Res, 2016. **215**: p. 114-20.
- 736 42. Lee, S.H., et al., *Transgenic expression of the activating natural killer receptor*  
737 *Ly49H confers resistance to cytomegalovirus in genetically susceptible mice.* J  
738 Exp Med, 2003. **197**(4): p. 515-26.
- 739 43. Brown, M.G., et al., *Vital involvement of a natural killer cell activation receptor*  
740 *in resistance to viral infection.* Science, 2001. **292**(5518): p. 934-7.
- 741 44. Zhi, L., et al., *Direct interaction of the mouse cytomegalovirus m152/gp40*  
742 *immunoevasin with RAE-1 isoforms.* Biochemistry, 2010. **49**(11): p. 2443-53.
- 743 45. Wang, R., et al., *Structural basis of mouse cytomegalovirus m152/gp40*  
744 *interaction with RAE1gamma reveals a paradigm for MHC/MHC interaction in*  
745 *immune evasion.* Proc Natl Acad Sci U S A, 2012. **109**(51): p. E3578-87.
- 746 46. Arapovic, J., et al., *Differential susceptibility of RAE-1 isoforms to mouse*  
747 *cytomegalovirus.* J Virol, 2009. **83**(16): p. 8198-207.
- 748 47. Farrell, H.E., et al., *Alveolar Macrophages Are a Prominent but Nonessential*  
749 *Target for Murine Cytomegalovirus Infecting the Lungs.* J Virol, 2015. **90**(6): p.  
750 2756-66.
- 751 48. Collins, T.M., M.R. Quirk, and M.C. Jordan, *Biphasic viremia and viral gene*  
752 *expression in leukocytes during acute cytomegalovirus infection of mice.*  
753 Journal of virology, 1994. **68**(10): p. 6305-6311.



- 754 49. Abolins, S., et al., *The comparative immunology of wild and laboratory mice,*  
755 *Mus musculus domesticus.* Nat Commun, 2017. **8**: p. 14811.
- 756 50. Zeleznjak, J., et al., *Mouse cytomegalovirus encoded immunoevasins and*  
757 *evolution of Ly49 receptors - Sidekicks or enemies?* Immunol Lett, 2017. **189**: p.  
758 40-47.
- 759 51. Forbes, C.A., et al., *Ly49C-dependent control of MCMV Infection by NK cells is*  
760 *cis-regulated by MHC Class I molecules.* PLoS Pathog, 2014. **10**(5): p.  
761 e1004161.
- 762 52. Goodpasture, E.W. and F.B. Talbot, *Concerning the nature of protozoan-like*  
763 *cells in certain lesions of infancy.* American Journal of Diseases of Children,  
764 1921. **21**(5): p. 415-425.
- 765 53. Wiesel, M., et al., *Th cells act via two synergistic pathways to promote antiviral*  
766 *CD8+ T cell responses.* J Immunol, 2010. **185**(9): p. 5188-97.
- 767 54. Jennings, S.R., et al., *CD4-positive T lymphocytes are required for the*  
768 *generation of the primary but not the secondary CD8-positive cytolytic T*  
769 *lymphocyte response to herpes simplex virus in C57BL/6 mice.* Cell Immunol,  
770 1991. **133**(1): p. 234-52.
- 771 55. Sun, J.C. and M.J. Bevan, *Defective CD8 T cell memory following acute infection*  
772 *without CD4 T cell help.* Science, 2003. **300**(5617): p. 339-42.
- 773 56. Sun, J.C., M.A. Williams, and M.J. Bevan, *CD4+ T cells are required for the*  
774 *maintenance, not programming, of memory CD8+ T cells after acute infection.*  
775 Nat Immunol, 2004. **5**(9): p. 927-33.
- 776 57. Cullen, J.G., et al., *CD4(+) T help promotes influenza virus-specific CD8(+) T cell*  
777 *memory by limiting metabolic dysfunction.* Proc Natl Acad Sci U S A, 2019.
- 778 58. Matloubian, M., R.J. Concepcion, and R. Ahmed, *CD4+ T cells are required to*  
779 *sustain CD8+ cytotoxic T-cell responses during chronic viral infection.* Journal  
780 of virology, 1994. **68**(12): p. 8056-8063.
- 781 59. Janssen, E.M., et al., *CD4+ T-cell help controls CD8+ T-cell memory via TRAIL-*  
782 *mediated activation-induced cell death.* Nature, 2005. **434**(7029): p. 88.
- 783 60. Obar, J.J., et al., *CD4+ T cell regulation of CD25 expression controls development*  
784 *of short-lived effector CD8+ T cells in primary and secondary responses.* Proc  
785 Natl Acad Sci U S A, 2010. **107**(1): p. 193-8.
- 786 61. Cardin, R.D., et al., *Progressive loss of CD8+ T cell-mediated control of a*  
787 *gamma-herpesvirus in the absence of CD4+ T cells.* J Exp Med, 1996. **184**(3): p.  
788 863-71.
- 789 62. Shedlock, D.J. and H. Shen, *Requirement for CD4 T cell help in generating*  
790 *functional CD8 T cell memory.* Science, 2003. **300**(5617): p. 337-9.
- 791 63. Belz, G.T., et al., *Absence of a functional defect in CD8+ T cells during primary*  
792 *murine gammaherpesvirus-68 infection of I-A(b<sup>-/-</sup>) mice.* J Gen Virol, 2003.  
793 **84**(Pt 2): p. 337-41.
- 794 64. Jennings, S.R., et al., *CD4-positive T lymphocytes are required for the*  
795 *generation of the primary but not the secondary CD8-positive cytolytic T*  
796 *lymphocyte response to herpes simplex virus in C57BL/6 mice.* Cellular  
797 immunology, 1991. **133**(1): p. 234-252.

- 798 65. Flaño, E., D.L. Woodland, and M.A. Blackman, *Requirement for CD4+ T cells in*  
799 *Vβ4+ CD8+ T cell activation associated with latent murine gammaherpesvirus*  
800 *infection*. The Journal of Immunology, 1999. **163**(6): p. 3403-3408.
- 801 66. Smith, C.M., et al., *Cognate CD4(+) T cell licensing of dendritic cells in CD8(+) T*  
802 *cell immunity*. Nat Immunol, 2004. **5**(11): p. 1143-8.
- 803 67. Snyder, C.M., et al., *CD4+ T cell help has an epitope-dependent impact on CD8+*  
804 *T cell memory inflation during murine cytomegalovirus infection*. J Immunol,  
805 2009. **183**(6): p. 3932-41.
- 806 68. Snyder, C.M., et al., *Cross-presentation of a spread-defective MCMV is sufficient*  
807 *to prime the majority of virus-specific CD8+ T cells*. PLoS One, 2010. **5**(3): p.  
808 e9681.
- 809 69. Busche, A., et al., *Priming of CD8+ T cells against cytomegalovirus-encoded*  
810 *antigens is dominated by cross-presentation*. J Immunol, 2013. **190**(6): p.  
811 2767-77.
- 812 70. Messerle, M., et al., *Cloning and mutagenesis of a herpesvirus genome as an*  
813 *infectious bacterial artificial chromosome*. Proceedings of the National  
814 Academy of Sciences, 1997. **94**(26): p. 14759-14763.
- 815 71. Farrington, L.A., et al., *Competition for antigen at the level of the APC is a major*  
816 *determinant of immunodominance during memory inflation in murine*  
817 *cytomegalovirus infection*. The Journal of Immunology, 2013: p. 1203151.
- 818 72. Turula, H., et al., *Competition between T cells maintains clonal dominance*  
819 *during memory inflation induced by MCMV*. European journal of immunology,  
820 2013. **43**(5): p. 1252-1263.
- 821 73. Zurbach, K.A., T. Moghbeli, and C.M. Snyder, *Resolving the titer of murine*  
822 *cytomegalovirus by plaque assay using the M2-10B4 cell line and a low*  
823 *viscosity overlay*. Virol J, 2014. **11**: p. 71.
- 824 74. Wagner, M., et al., *Systematic excision of vector sequences from the BAC-cloned*  
825 *herpesvirus genome during virus reconstitution*. J Virol, 1999. **73**(8): p. 7056-  
826 60.
- 827 75. Snyder, C.M., et al., *Memory inflation during chronic viral infection is*  
828 *maintained by continuous production of short-lived, functional T cells*.  
829 Immunity, 2008. **29**(4): p. 650-9.  
830



# Figure 1

bioRxiv preprint doi: <https://doi.org/10.1101/618132>; this version posted April 24, 2019. The copyright holder for this preprint (which was not certified by peer review) is the author/funder, who has granted bioRxiv a license to display the preprint in perpetuity. It is made available under aCC-BY 4.0 International license.

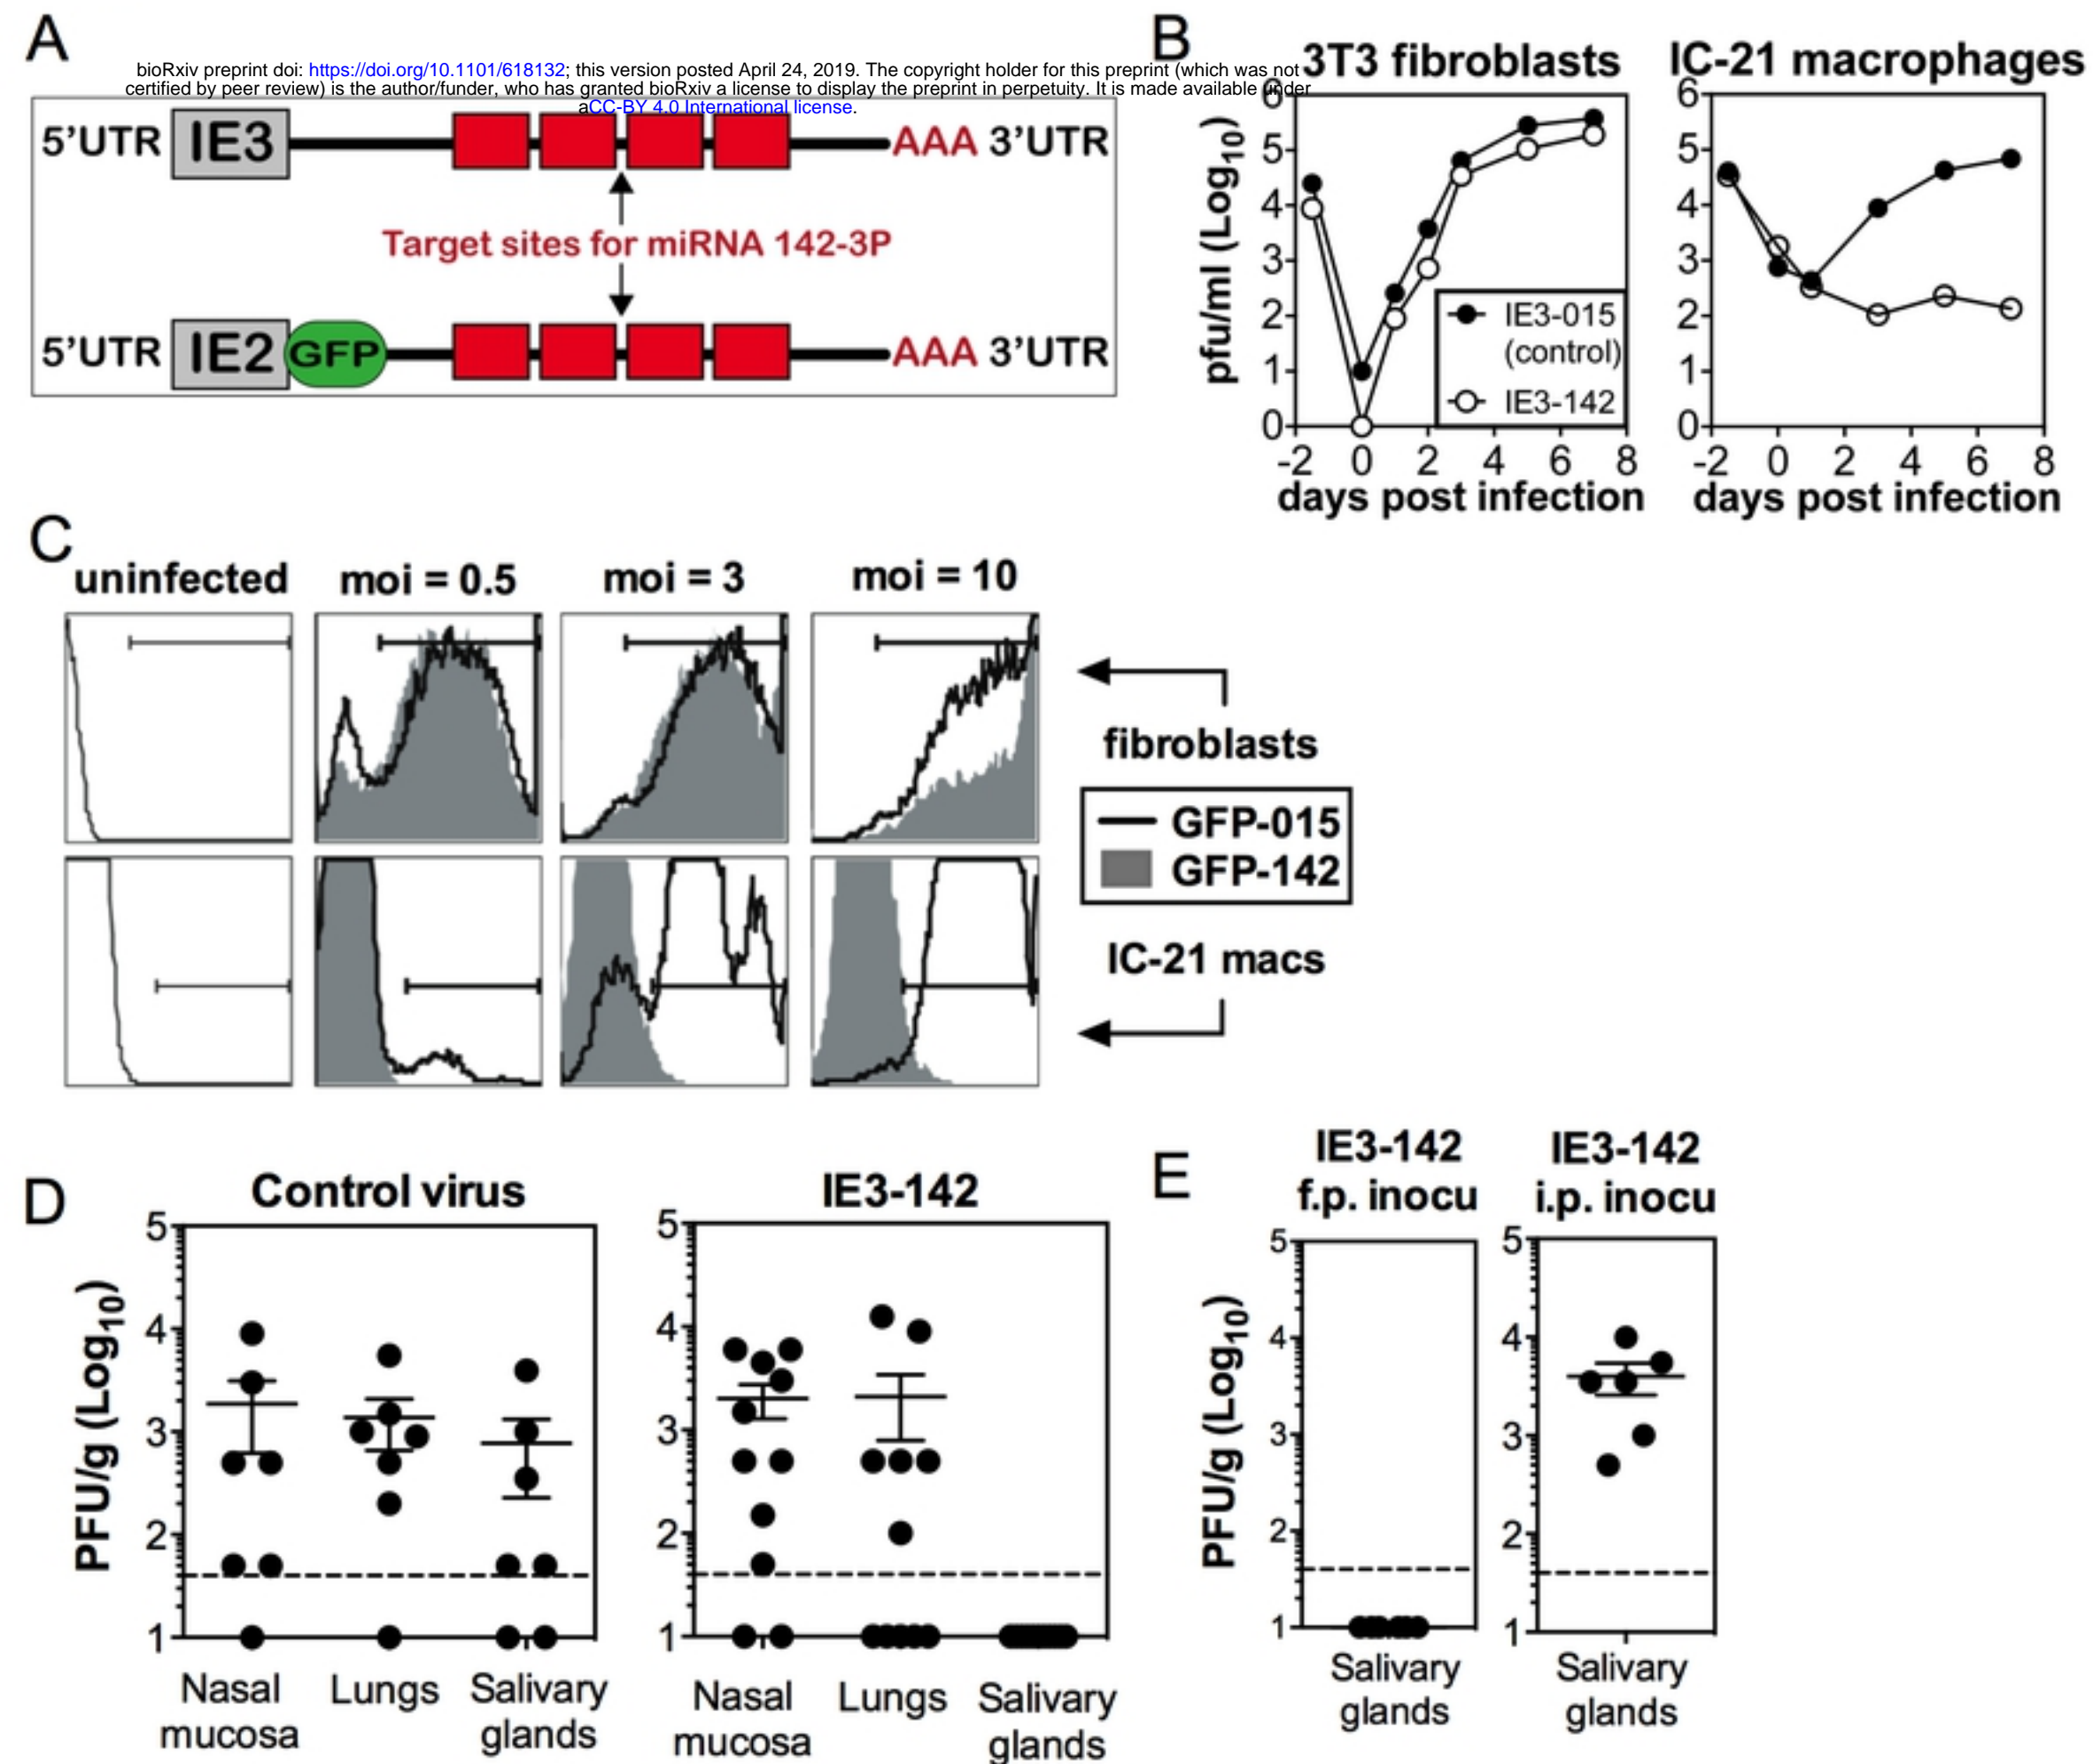

Figure 1

# Figure 2

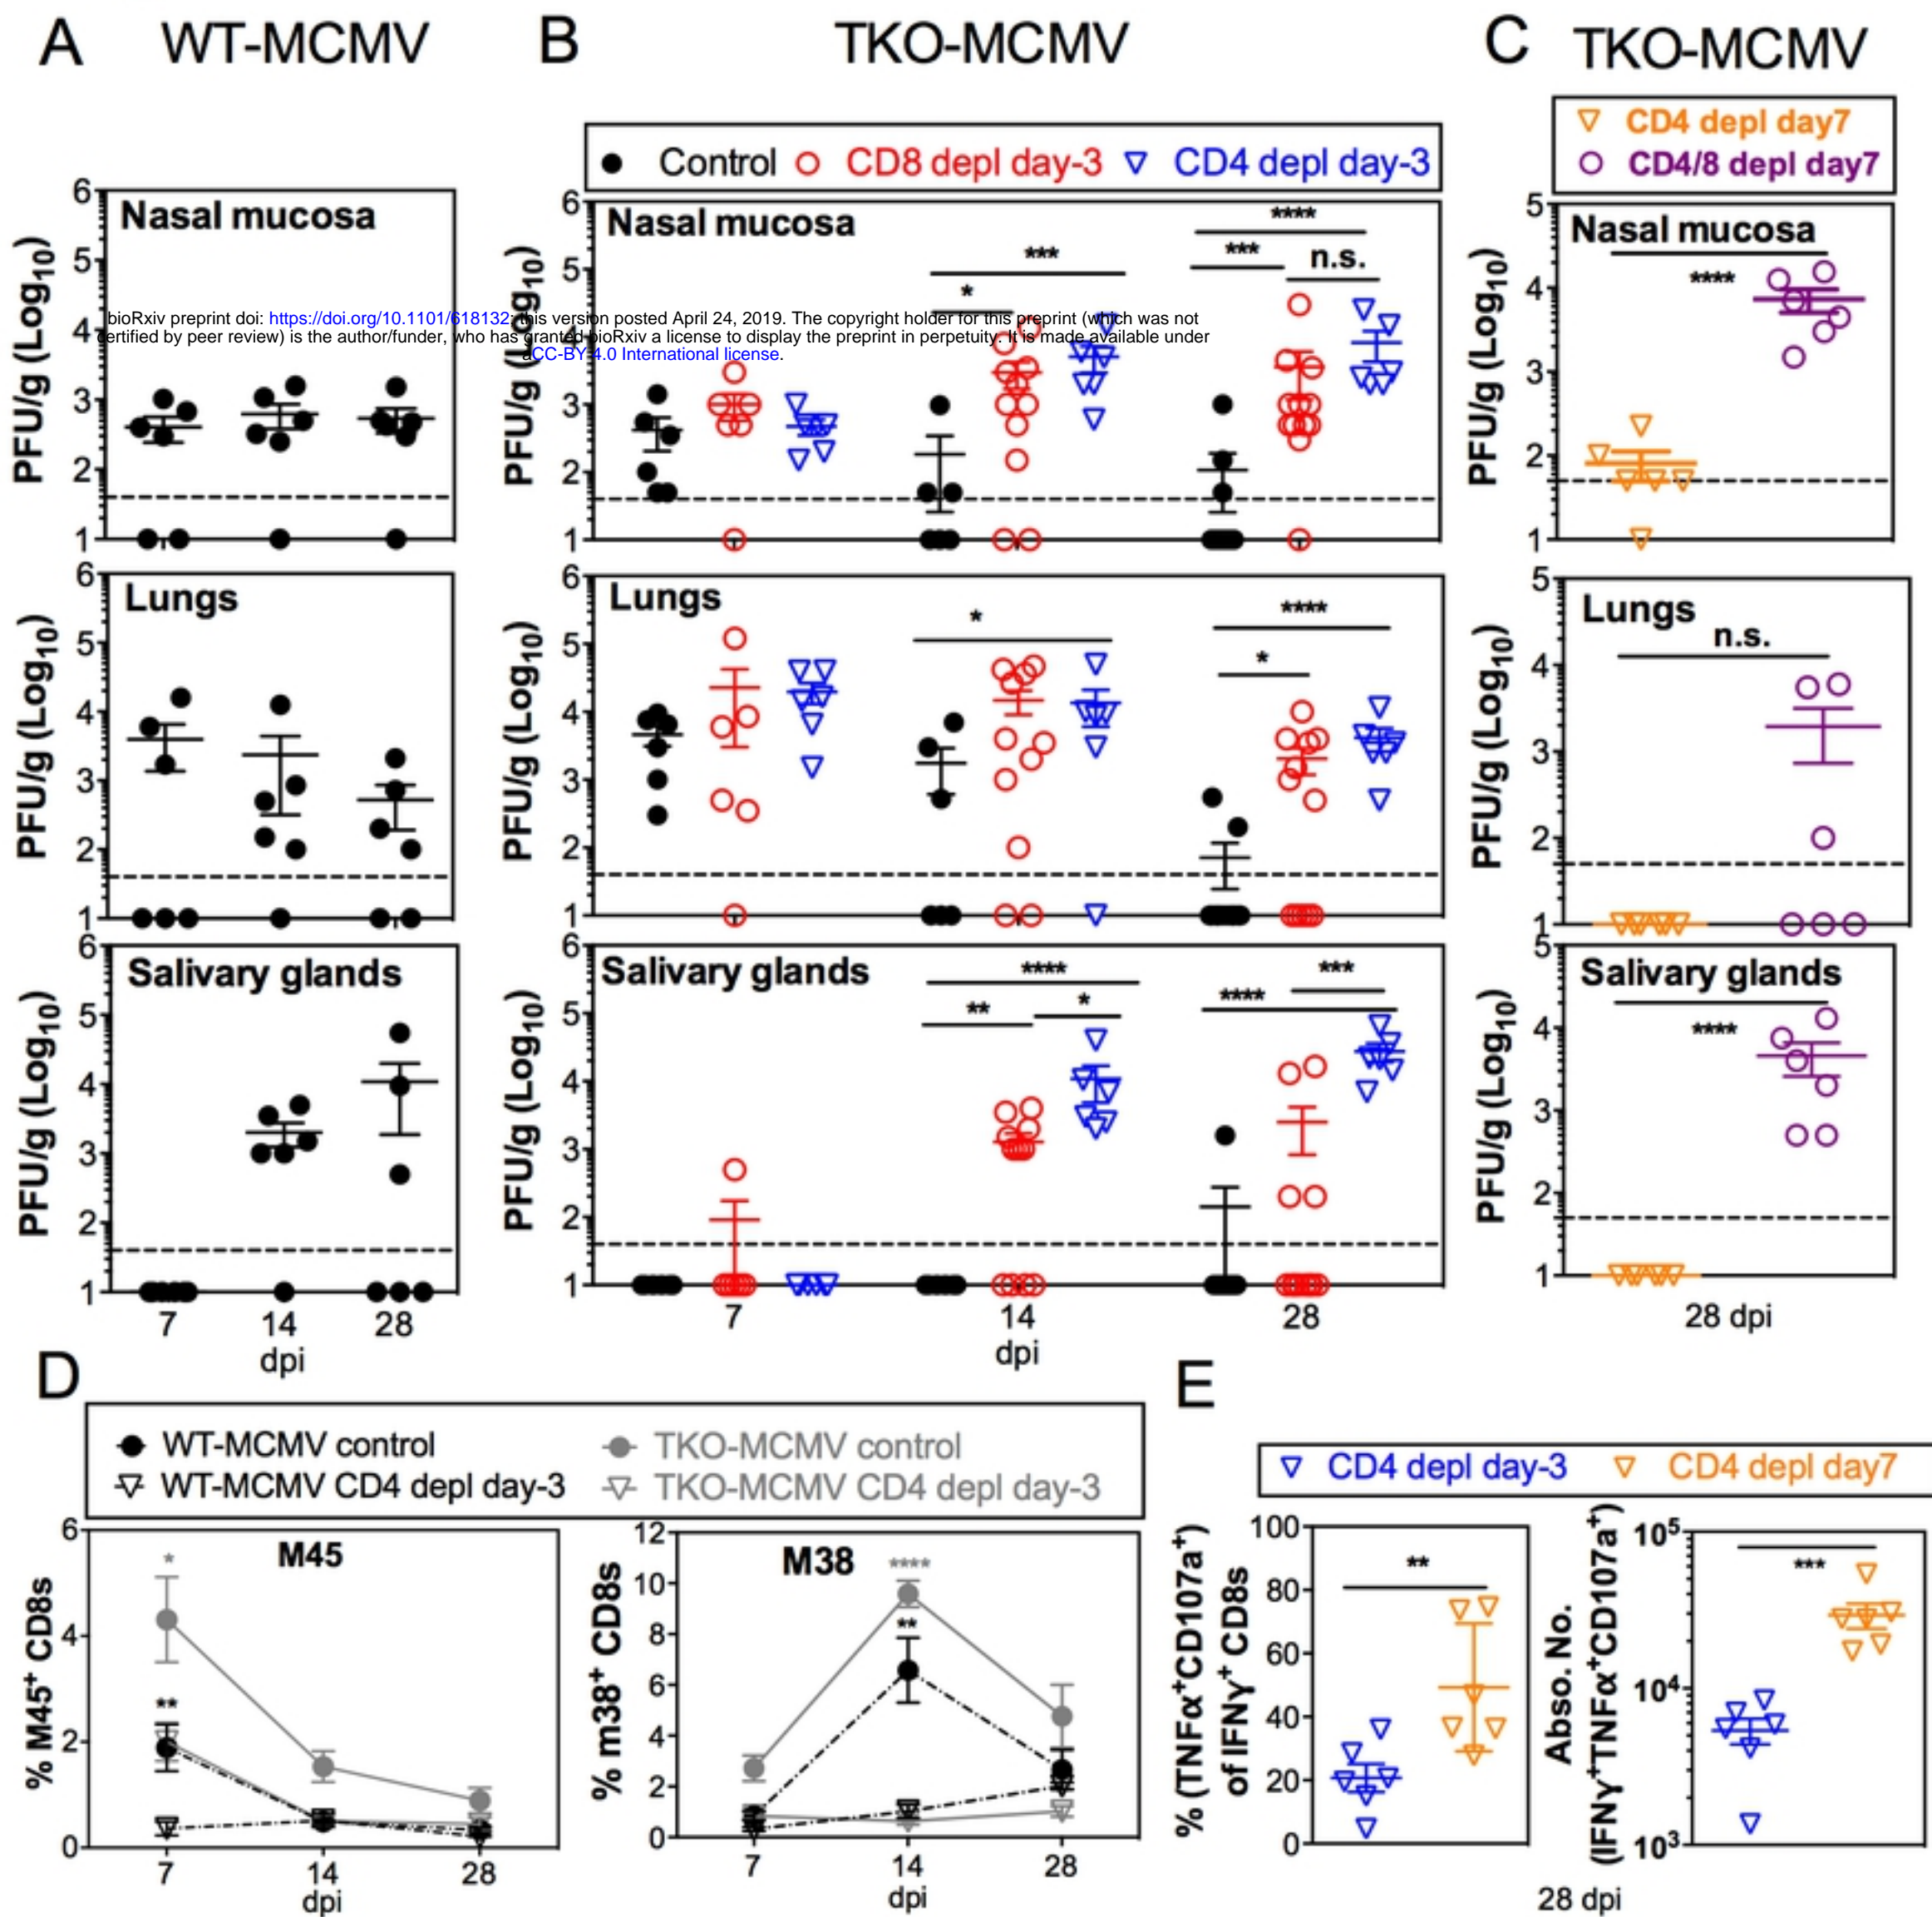

Figure 2



# Figure 4

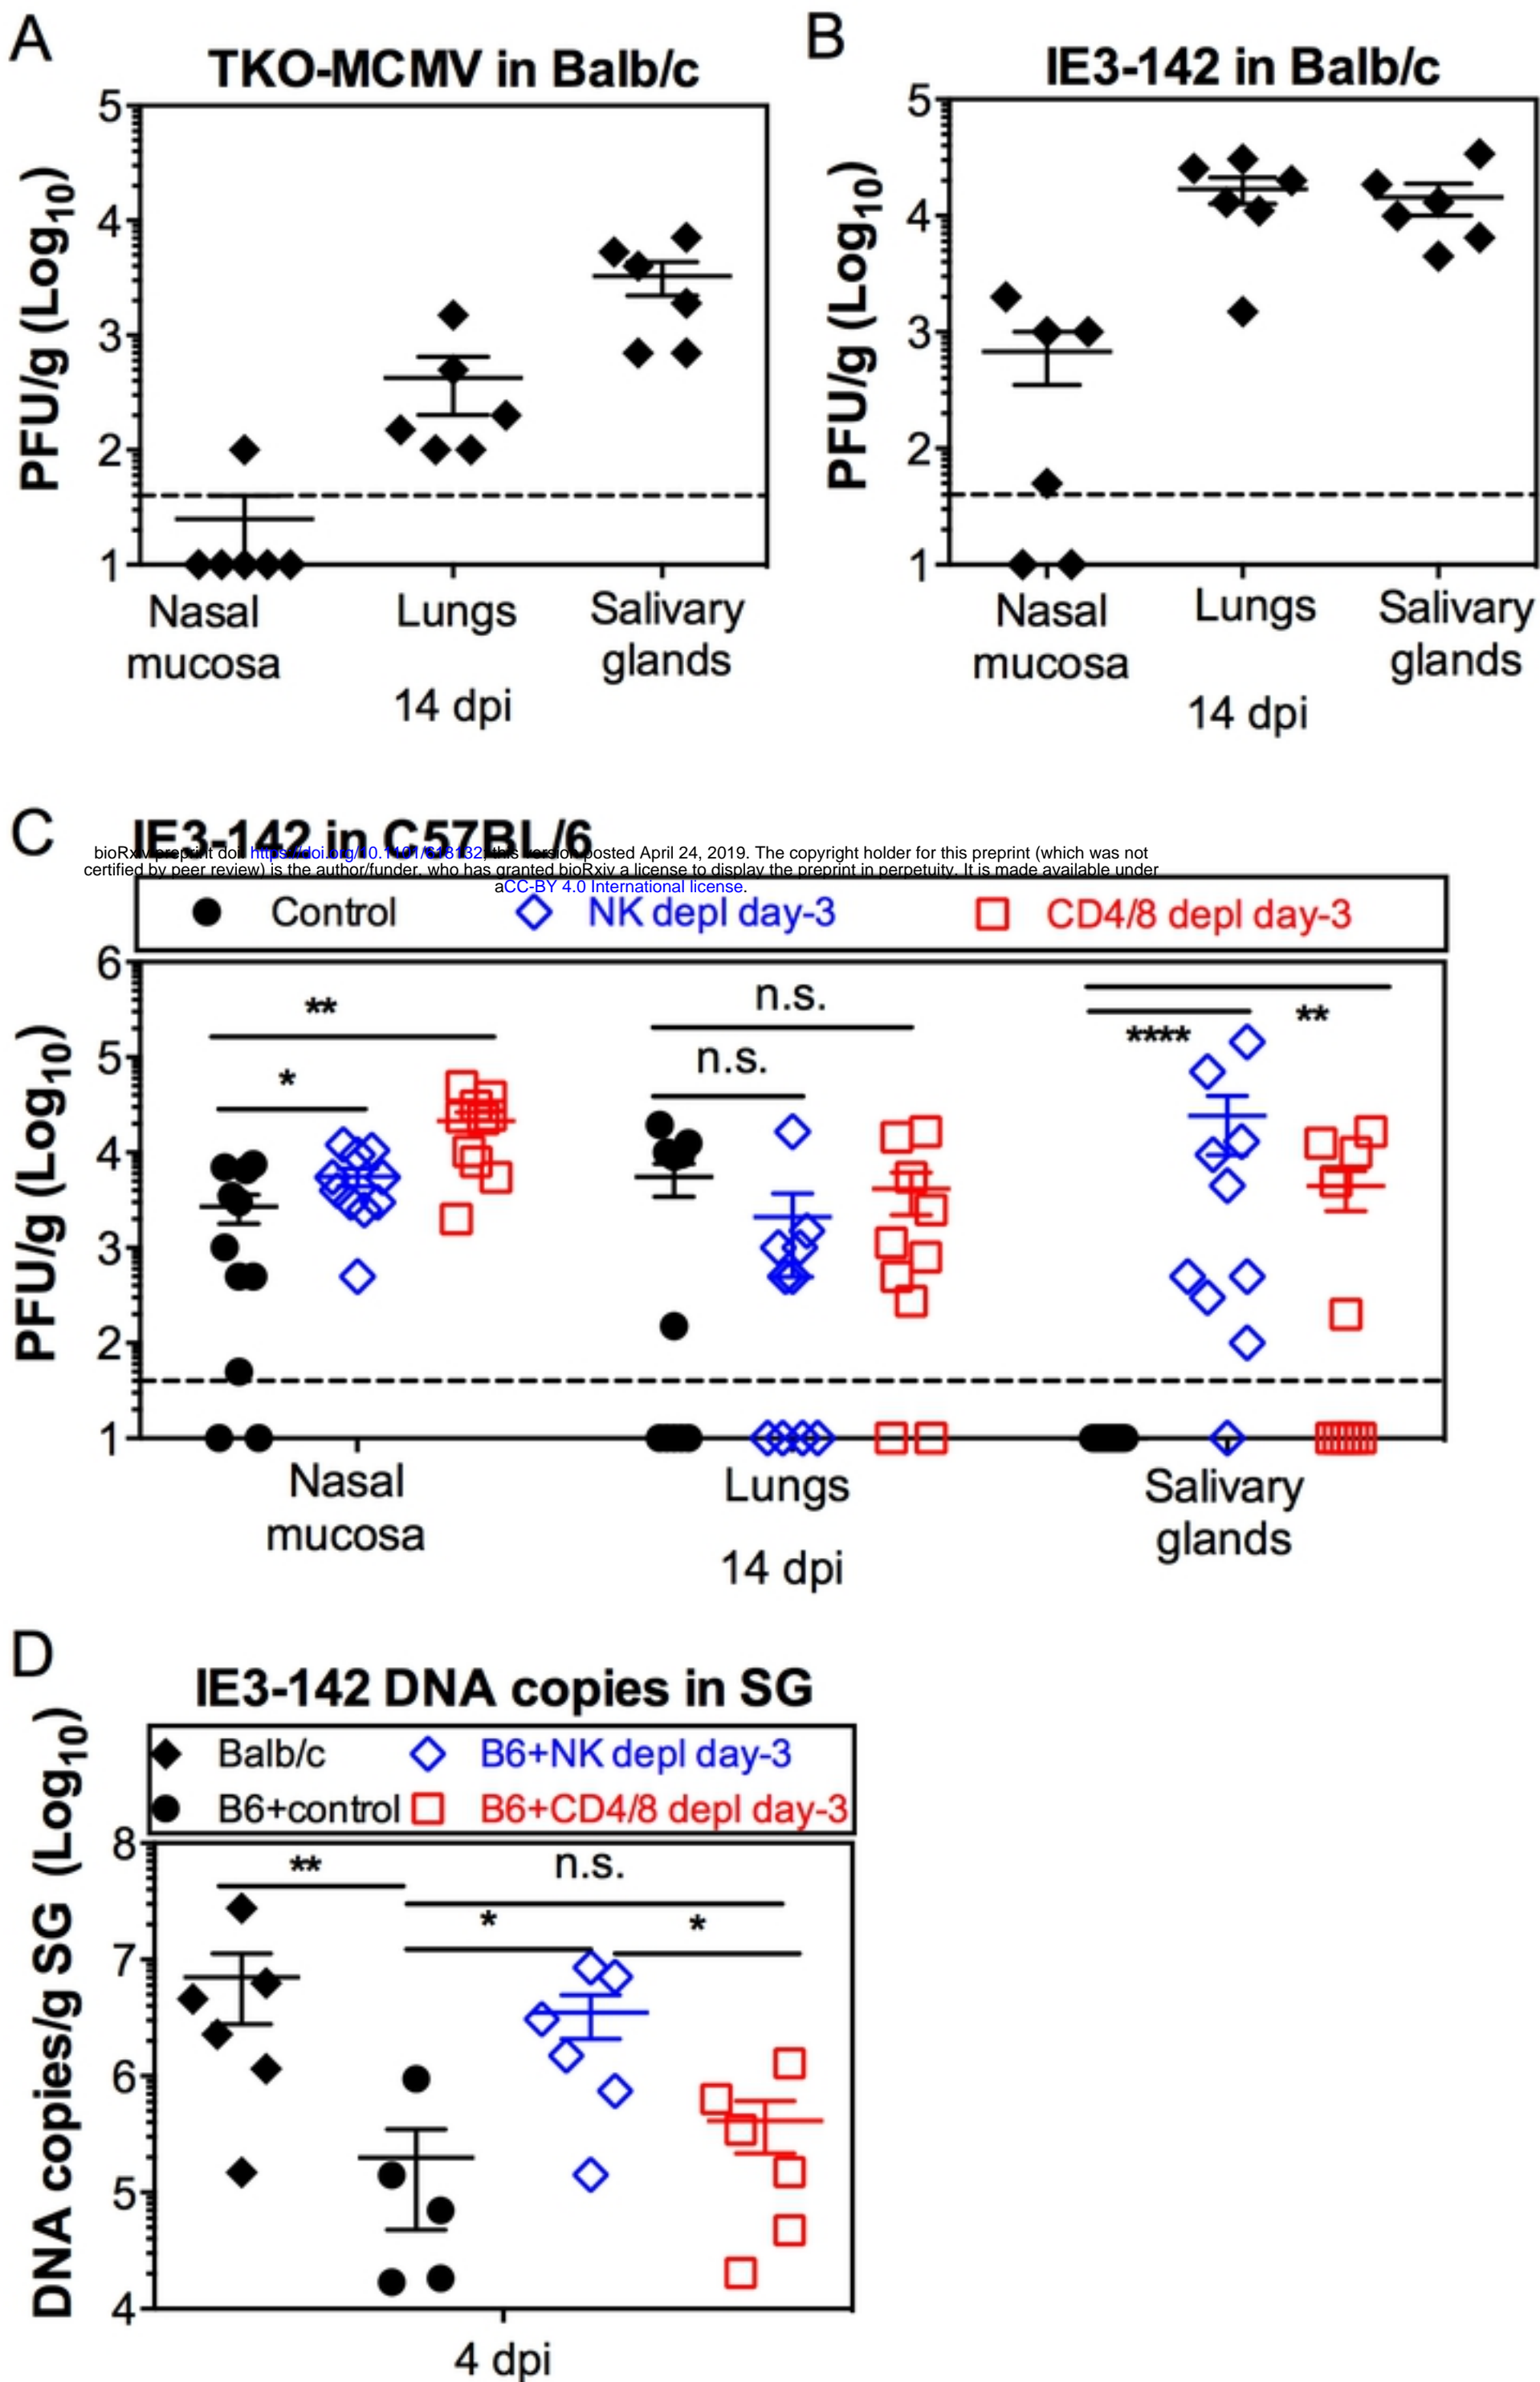

Figure 4

# Figure 3

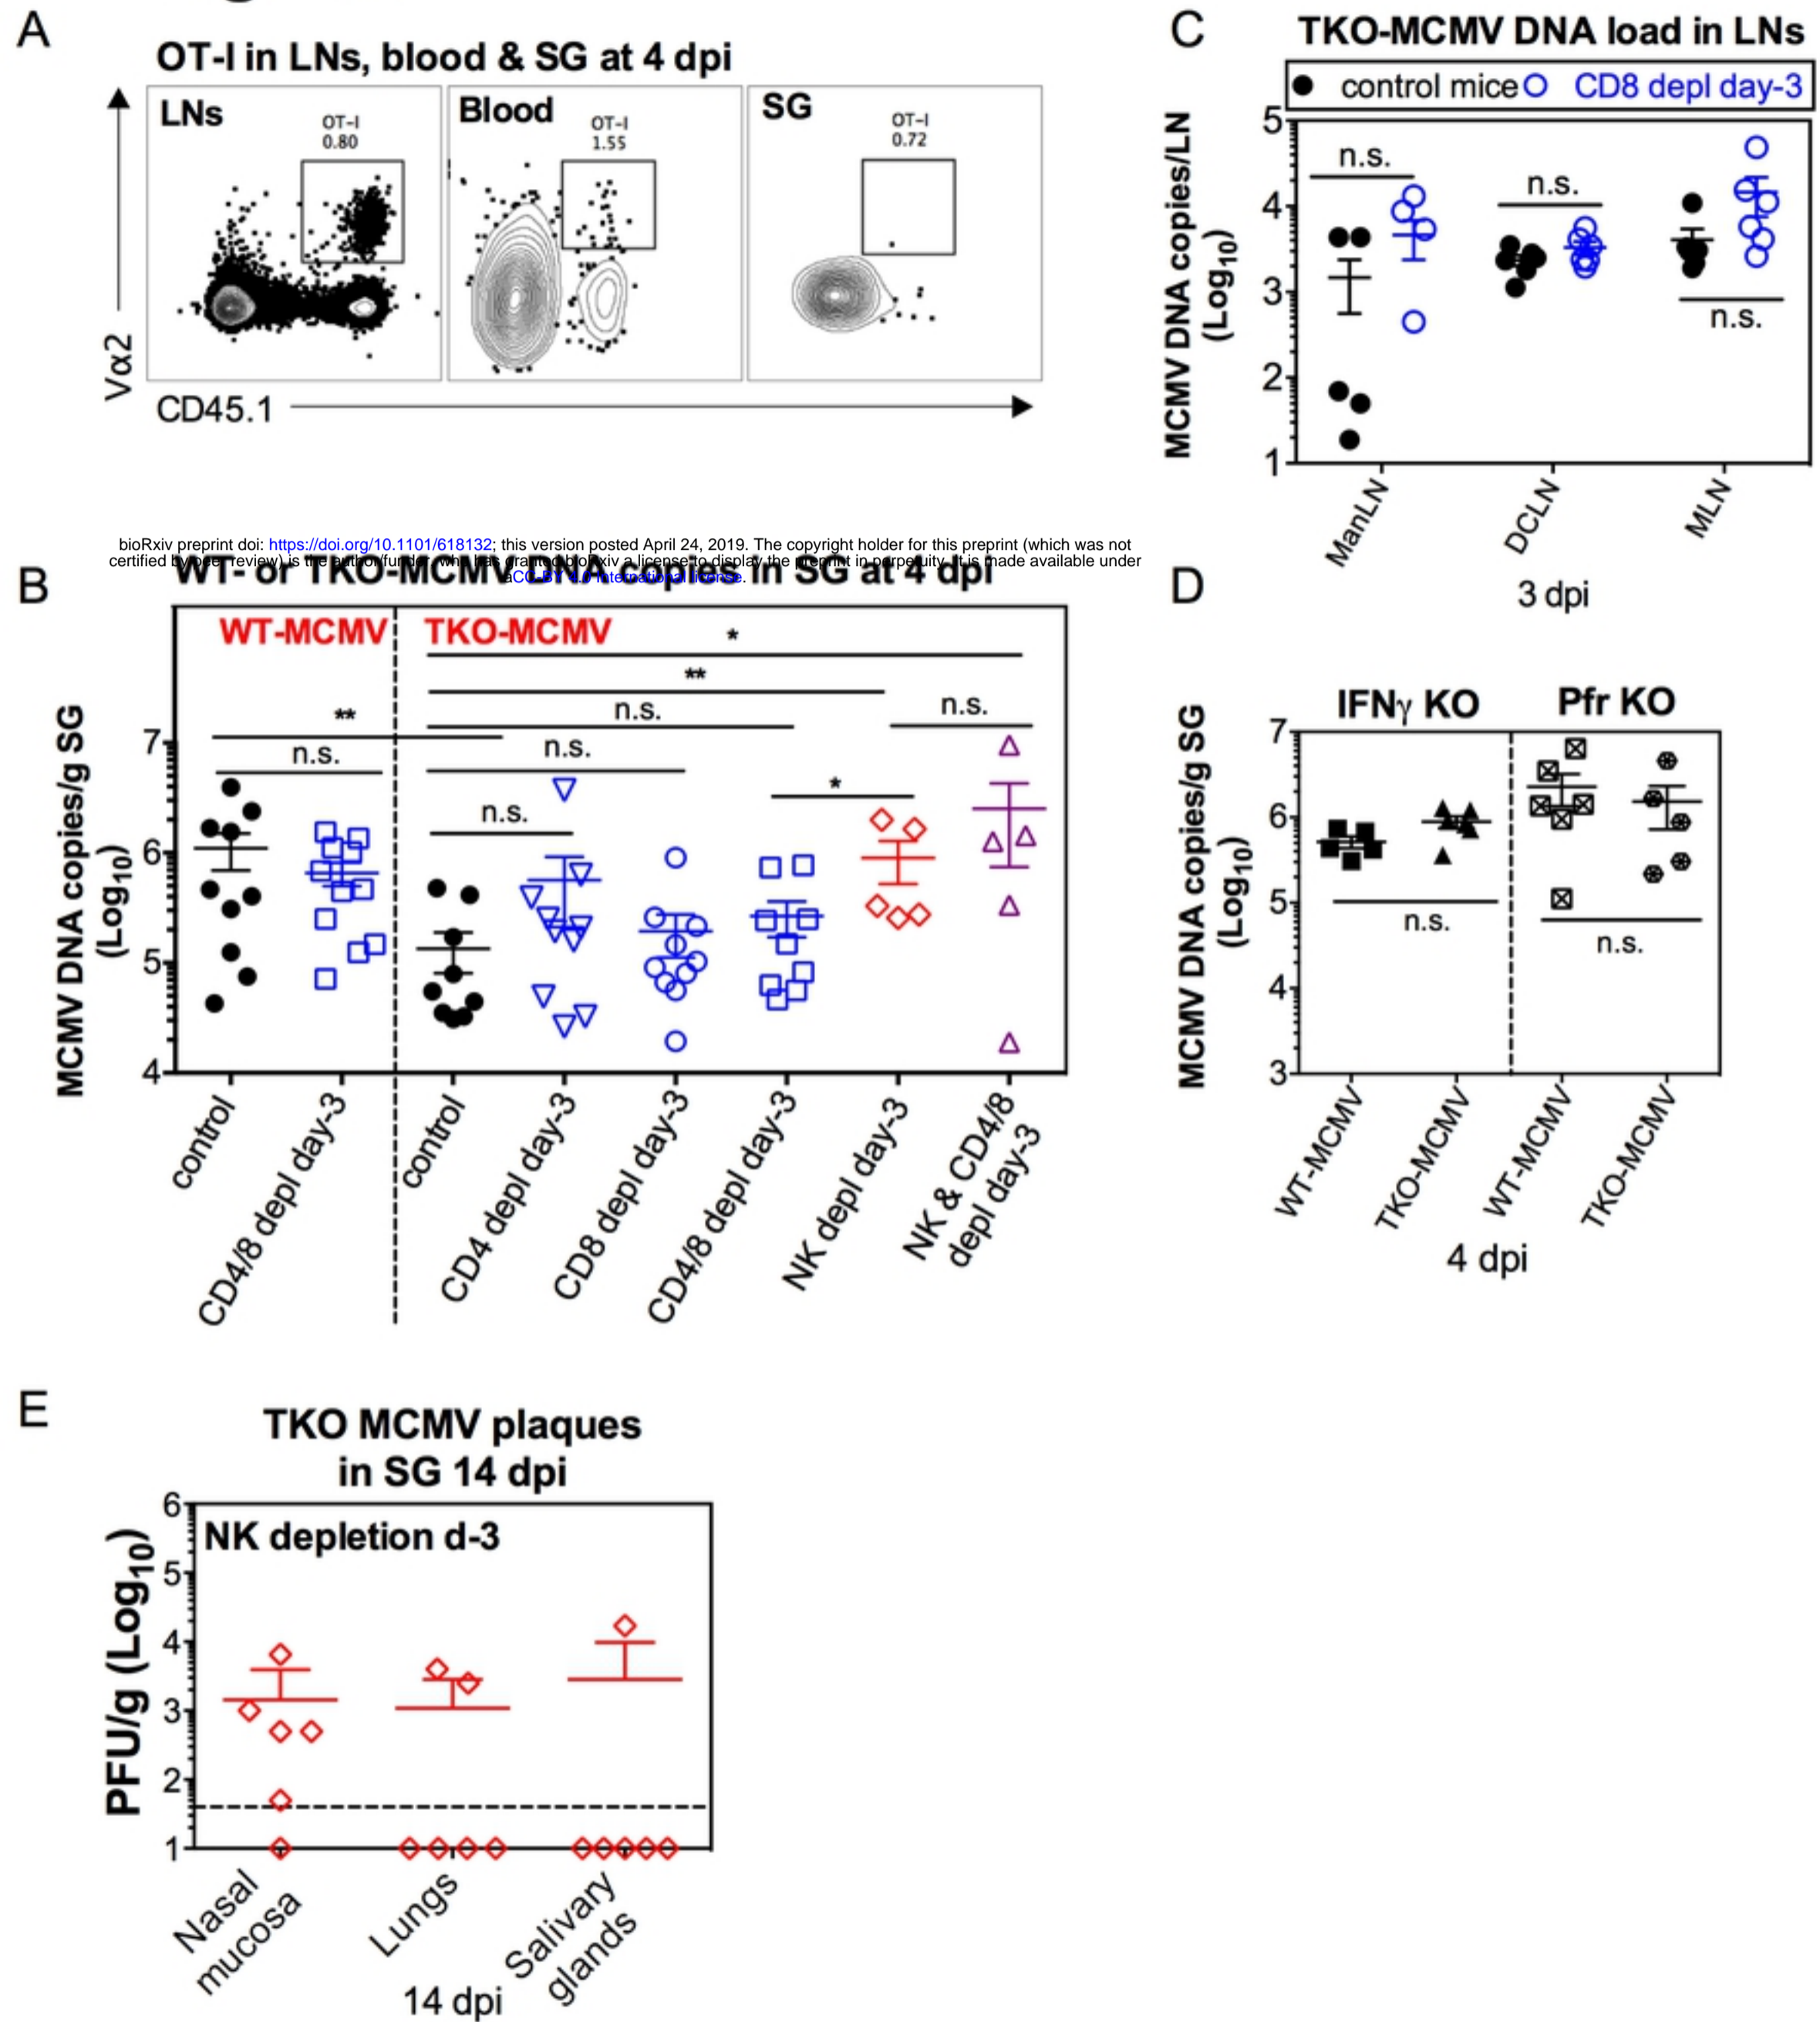

bioRxiv preprint doi: <https://doi.org/10.1101/618132>; this version posted April 24, 2019. The copyright holder for this preprint (which was not certified by peer review) is the author/funder, who has granted bioRxiv a license to display the preprint in perpetuity. It is made available under aCC-BY 4.0 International license.

Figure 3
